# Supplementary material for: Sea salt reactivity over the northwest Atlantic: an in-depth look using the airborne ACTIVATE dataset
Source: Copernicus journal article supplement (doi:10.5194/acp-24-3349-2024), 2024-03-18
Supplement: Supplementary file 1 [file acp-24-3349-2024-supplement.pdf]

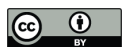

*Supplement of*

## **Sea salt reactivity over the northwest Atlantic: an in-depth look using the airborne ACTIVATE dataset**

**Eva-Lou Edwards et al.**

*Correspondence to:* Armin Sorooshian ([armin@arizona.edu](mailto:armin@arizona.edu))

The copyright of individual parts of the supplement might differ from the article licence.

21 **S1. Additional information for Equations 1 - 5**

22 Equations 1 – 4 comprise a system of four equations for determining the contribution of sea  
23 salt and dust to bulk PILS  $\text{Na}^+$  and  $\text{Ca}^{2+}$  mass concentrations. Equation 5 (derived from Eqs. 1 –  
24 4) can produce negative values for  $\text{ssNa}^+$  depending on  $\text{Na}^+_{\text{bulk}}$  and  $\text{Ca}^{2+}_{\text{bulk}}$ . In these cases,  $\text{ssNa}^+$   
25 is set to 0, which prevents negative mass concentrations from also being assigned to  $\text{Na}^+_{\text{dust}}$ ,  $\text{ssCa}^{2+}$ ,  
26 and  $\text{Ca}^{2+}_{\text{dust}}$ .

27 **S2. Additional information for Equations 6 - 14**

28 Equations 6 – 13 constitute a system of equations for determining the contribution of sea salt,  
29 dust, and emissions from combustion processes to bulk PILS  $\text{Na}^+$ ,  $\text{Ca}^{2+}$ , and  $\text{K}^+$  mass  
30 concentrations. When a computer-based solver attempts to solve Eqs. 6 – 13, nonphysical results  
31 are often produced (i.e., either negative mass concentrations arise for certain species or there is no  
32 solution at all). Thus, we manually solve for one unknown variable at a time and adjust calculated  
33 values as necessary to arrive at a physical solution using the following method:

- 34 1. Manual calculations begin with Eq. 14 (derived from Eqs. 6 – 13), yet Eq. 14 can produce  
35 negative values for  $\text{ssNa}^+$  depending on  $\text{Na}^+_{\text{bulk}}$ ,  $\text{Ca}^{2+}_{\text{bulk}}$ ,  $\text{K}^+_{\text{bulk}}$ , and the selected  
36  $\left(\frac{\text{Na}^+}{\text{K}^+}\right)_{\text{comb}}$ . In these cases,  $\text{ssNa}^+$  is set to 0, which prevents negative mass concentrations  
37 from also being assigned to  $\text{ssCa}^{2+}$  and  $\text{ssK}^+$  via Eq. 9 and 11, respectively.
- 38 2. If  $\text{ssCa}^{2+}$  and  $\text{ssK}^+$  exceed  $\text{Ca}^{2+}_{\text{bulk}}$  and  $\text{K}^+_{\text{bulk}}$ , respectively,  $\text{ssCa}^{2+}$  and  $\text{ssK}^+$  are set to  
39  $\text{Ca}^{2+}_{\text{bulk}}$  and  $\text{K}^+_{\text{bulk}}$ , respectively.
- 40 3. If the sum of  $\text{K}^+_{\text{dust}}$  and  $\text{ssK}^+$  exceed  $\text{K}^+_{\text{bulk}}$ ,  $\text{K}^+_{\text{dust}}$  is set to  $\text{K}^+_{\text{bulk}} - \text{ssK}^+$ , which forces  $\text{K}^+_{\text{comb}}$   
41 to be 0.
- 42 4. If the sum of  $\text{Na}^+_{\text{comb}}$  and  $\text{ssNa}^+$  exceed  $\text{Na}^+_{\text{bulk}}$ ,  $\text{Na}^+_{\text{comb}}$  is set to  $\text{Na}^+_{\text{bulk}} - \text{ssNa}^+$ , which  
43 forces  $\text{Na}^+_{\text{dust}}$  to be 0. Note that this adjustment prioritizes allotment of  $\text{Na}^+_{\text{bulk}}$  to  $\text{Na}^+_{\text{comb}}$   
44 over  $\text{Na}^+_{\text{dust}}$ . We performed this same adjustment except prioritizing assignment of  $\text{Na}^+_{\text{bulk}}$   
45 to  $\text{Na}^+_{\text{dust}}$  over  $\text{Na}^+_{\text{comb}}$ , and it did not significantly alter our results.

46 **Table S1.** Nomenclature for variables used in calculations relevant to Cl<sup>-</sup> depletion.

| <b>Variable(s)</b>                                                                                      | <b>Description</b>                                                                                                                                                                                                                                                                                                                                                                                                                       |
|---------------------------------------------------------------------------------------------------------|------------------------------------------------------------------------------------------------------------------------------------------------------------------------------------------------------------------------------------------------------------------------------------------------------------------------------------------------------------------------------------------------------------------------------------------|
| $Na_{bulk}^+, Ca_{bulk}^{2+}, K_{bulk}^+, SO_{4,bulk}^{2-}, NO_{3,bulk}^-, oxalate_{bulk}, Cl_{bulk}^-$ | Raw mass concentrations for each of the species listed from PILS-IC analysis. <sup>1</sup>                                                                                                                                                                                                                                                                                                                                               |
| $NH_{4,bulk}^+$                                                                                         | Raw mass concentrations of NH <sub>4</sub> <sup>+</sup> from the AMS <sup>2</sup> .                                                                                                                                                                                                                                                                                                                                                      |
| $ssNa^+, ssCa^{2+}, ssK^+$                                                                              | Derived mass concentrations attributed to sea salt for each of the species listed.                                                                                                                                                                                                                                                                                                                                                       |
| $Na_{dust}^+, Ca_{dust}^{2+}, K_{dust}^+$                                                               | Derived mass concentrations attributed to dust for each of the species listed.                                                                                                                                                                                                                                                                                                                                                           |
| $Na_{comb}^+, K_{comb}^+$                                                                               | Derived mass concentrations attributed to combustion processes for each of the species listed.                                                                                                                                                                                                                                                                                                                                           |
| <i>Sea salt</i>                                                                                         | Derived mass concentrations of sea salt.                                                                                                                                                                                                                                                                                                                                                                                                 |
| <i>%Cl<sup>-</sup> depletion</i>                                                                        | Derived percentages of the original Cl <sup>-</sup> in sea salt particles that has since been displaced through depletion reactions.                                                                                                                                                                                                                                                                                                     |
| <i>Lost Cl<sup>-</sup></i>                                                                              | Derived mass concentrations of particulate Cl <sup>-</sup> displaced from sea salt particles (when reported in units of μg m <sup>-3</sup> ) or the molar fraction of gaseous Cl added to the atmosphere following Cl <sup>-</sup> depletion reactions (when reported in units of pptv or ppbv). Note these are equivalent. Values are calculated using Approach 1, meaning that non-sea salt sources of Na <sup>+</sup> are considered. |
| <i>Lost Cl<sub>bulk</sub><sup>-</sup></i>                                                               | Same as lost Cl <sup>-</sup> above, but calculated using Approach 2, meaning that sea salt is assumed to be the only source of atmospheric Na <sup>+</sup> .                                                                                                                                                                                                                                                                             |
| <i>Lost Cl<sub>diff</sub><sup>-</sup></i>                                                               | Difference between lost Cl <sub>bulk</sub> <sup>-</sup> and lost Cl <sup>-</sup> , which is used to understand how assumptions about the source(s) of atmospheric Na <sup>+</sup> affect derived amounts of displaced Cl <sup>-</sup> .                                                                                                                                                                                                  |
| $nssSO_4^{2-}$                                                                                          | Derived mass concentrations of SO <sub>4</sub> <sup>2-</sup> attributed to sources other than sea salt.                                                                                                                                                                                                                                                                                                                                  |
| $ExSO_4^{2-}, ExNO_3^-$                                                                                 | Derived mass concentrations of SO <sub>4</sub> <sup>2-</sup> and NO <sub>3</sub> <sup>-</sup> , respectively, remaining after neutralization with NH <sub>4</sub> <sup>+</sup> .                                                                                                                                                                                                                                                         |
| $ExNH_4^+$                                                                                              | Derived mass concentrations of remaining NH <sub>4</sub> <sup>+</sup> after neutralizing nssSO <sub>4</sub> <sup>2-</sup> .                                                                                                                                                                                                                                                                                                              |
| <i>Excess acidic species</i>                                                                            | Derived total mass concentrations of the acidic species not neutralized by ammonium and, thus, having the potential to displace Cl <sup>-</sup> from sea salt particles.                                                                                                                                                                                                                                                                 |
| <i>Lost Cl<sup>-</sup> attr. to A</i>                                                                   | Hypothetical mass concentrations of the amount of Cl <sup>-</sup> a given acidic species has the potential to displace, where A can be ExSO <sub>4</sub> <sup>2-</sup> , Ex NO <sub>3</sub> <sup>-</sup> , or oxalate <sub>bulk</sub> .                                                                                                                                                                                                  |
| <i>Lost Cl<sup>-</sup> attr. to excess acidic species</i>                                               | Hypothetical mass concentration of the total Cl <sup>-</sup> that can be displaced from sea salt particles based on the available amount of excess acidic species.                                                                                                                                                                                                                                                                       |

- 47 <sup>1</sup>“PILS-IC analysis” refers to in-flight sampling with a particle into liquid sampler (PILS)  
48 following by offline sample analysis using ion chromatography (IC).  
49 <sup>2</sup>“AMS” stands for aerosol mass spectrometer.

50 **Table S2.** Mass ratios, molecular weights, and charges of fully deprotonated conjugate bases  
 51 used in calculations relevant to Cl<sup>-</sup> depletion.

| Type of parameter                                            | Parameter                                          | Value                    |
|--------------------------------------------------------------|----------------------------------------------------|--------------------------|
| Mass ratio [unitless]                                        | $\left(\frac{\text{total mass}}{Na^+}\right)_{ss}$ | 3.267 <sup>a</sup>       |
|                                                              | $\left(\frac{Ca^{2+}}{Na^+}\right)_{ss}$           | 0.038 <sup>b, c</sup>    |
|                                                              | $\left(\frac{Ca^{2+}}{Na^+}\right)_{dust}$         | 1.78 <sup>b</sup>        |
|                                                              | $\left(\frac{K^+}{Na^+}\right)_{ss}$               | 0.036 <sup>a, c</sup>    |
|                                                              | $\left(\frac{K^+}{Ca^{2+}}\right)_{dust}$          | 1.00 <sup>d</sup>        |
|                                                              | $\left(\frac{Na^+}{K^+}\right)_{comb}$             | See Table S2             |
|                                                              | $\left(\frac{SO_4^{2-}}{Na^+}\right)_{ss}$         | 0.253 <sup>e, f, g</sup> |
|                                                              | $\left(\frac{Cl^-}{Na^+}\right)_{ss}$              | 1.81 <sup>b</sup>        |
| Molecular weight<br>[g mol <sup>-1</sup> ]                   | $MW_{SO_4^{2-}}$                                   | 96.056                   |
|                                                              | $MW_{NH_4^+}$                                      | 18.039                   |
|                                                              | $MW_{NO_3^-}$                                      | 62.005                   |
|                                                              | $MW_{Cl^-}$                                        | 35.453                   |
|                                                              | $MW_{oxalate}$                                     | 88.019                   |
| Charge of fully<br>deprotonated conjugate<br>base [unitless] | $\gamma_{SO_4^{2-}}$                               | 2                        |
|                                                              | $\gamma_{NO_3^-}$                                  | 1                        |
|                                                              | $\gamma_{oxalate}$                                 | 2                        |

52 <sup>a</sup>Seinfeld and Pandis (2016)

53 <sup>b</sup>Bowen (1979)

54 <sup>c</sup>Finlayson-Pitts and Pitts (2000)

55 <sup>d</sup>Aldhaif et al. (2020)

56 <sup>e</sup>Becagli et al. (2005)

57 <sup>f</sup>Boreddy and Kawamura (2015)

58 <sup>g</sup>Farren et al. (2019)

59 **Table S3.** Details regarding the various  $\left(\frac{Na^+}{K^+}\right)_{comb}$  ratios used when exploring how different  
 60 combustion processes may affect calculations relevant to Cl<sup>-</sup> depletion.

| <b>Indicator used in text</b> | <b>Description of combustion process</b>                                                                                      | <b>Value</b>         |
|-------------------------------|-------------------------------------------------------------------------------------------------------------------------------|----------------------|
| Herbaceous agricultural fire  | Agricultural burning of herbaceous crop residue                                                                               | 0.05 <sup>a</sup>    |
| Forest fire                   | Forest fire burning of pinion and juniper trees                                                                               | 0.08 <sup>b</sup>    |
| Industrial (avg)              | Average from industrial operations at steel mills and cement plants                                                           | 0.24 <sup>c, d</sup> |
| Sauna stove                   | Inefficient batch combustion of birch wood in a sauna stove for residential heating                                           | 0.75 <sup>e</sup>    |
| Car exhaust                   | Fossil fuel combustion by motor vehicles                                                                                      | 0.91 <sup>c, f</sup> |
| Coal combustion (avg)         | Average from burning of pulverized western coal comprised of low sulfur (0.5%) and high ash (22%) at a coal-fired power plant | 3.03 <sup>c, g</sup> |

61 <sup>a</sup>Turn et al. (1997)

62 <sup>b</sup>Watson et al. (2001)

63 <sup>c</sup>Ooki et al. (2002)

64 <sup>d</sup>Scheff and Valiozis (1990)

65 <sup>e</sup>Lamberg et al. (2011)

66 <sup>f</sup>Huang et al. (1994)

67 <sup>g</sup>Ondov et al. (1989)

68 **Table S4.** Summary of findings from this work as well as those from previous studies conducted around the globe. “BDL” stands for  
69 below detection limit, and “SSA” stands for sea salt aerosol. Several abbreviations are used and are defined as the following: “Ref” =  
70 reference, “Alt” = relevant altitudes, “Dp” = particle size range, “Stat” = statistic reported, “SSA” = sea salt aerosol, “Attr. Na<sup>+</sup> to nss  
71 sources” = Attributes Na<sup>+</sup> to non-sea salt sources, “Eq” = equation, “Air” = aircraft, “Surf” = surface station(s), “Med” = median, and  
72 “Rng” = range, “USEC” = United States East Coast, and “BDL” = below detection limit.

| Ref                                       | Date         | Site                                         | Platform | Alt                | D <sub>p</sub>   | Stat | SSA                | Na <sup>+</sup>    | K <sup>+</sup>     | Ca <sup>2+</sup>   | Cl <sup>-</sup>    | Nss SO <sub>4</sub> <sup>2-</sup> | NO <sub>3</sub> <sup>-</sup> | NH <sub>4</sub> <sup>+</sup> | Cl <sup>-</sup> : Na <sup>+</sup> | Lost Cl <sup>-</sup>      | Cl <sup>-</sup> depletion | Attr. Na <sup>+</sup> to nss sources | Eq/ method for determining SSA mass and/or Cl <sup>-</sup> depletion (%) | Eq/ method ref                                         |
|-------------------------------------------|--------------|----------------------------------------------|----------|--------------------|------------------|------|--------------------|--------------------|--------------------|--------------------|--------------------|-----------------------------------|------------------------------|------------------------------|-----------------------------------|---------------------------|---------------------------|--------------------------------------|--------------------------------------------------------------------------|--------------------------------------------------------|
|                                           |              |                                              |          | m a.s.l            | μm               |      | μg m <sup>-3</sup>                | μg m <sup>-3</sup>           | μg m <sup>-3</sup>           |                                   | μg m <sup>-3</sup> / pptv | %                         |                                      |                                                                          |                                                        |
| This study                                | Dec-Feb 2022 | USEC; 34.0°–41.7° N/70.0°–76.7° W            | Air      | 160–200            | < 5 <sup>1</sup> | Med  | 0.61               | 0.25               | 0.04               | 0.0                | 0.3                | 0.66                              | 0.49                         | 0.27                         | 1.70 <sup>2</sup>                 | 0.04/27                   | 6                         | Yes                                  | Eqs. 1 – 4, 15, 16                                                       | Boreddy and Kawamura (2015); AzadiAghdam et al. (2019) |
|                                           | Mar 2022     | USEC; 32.2°–38.5° N/69.1°–76.5° W            |          |                    |                  |      | 0.65               | 0.27               | 0.07               | 0.1                | 0.4                | 0.71                              | 0.81                         | 0.38                         | 1.62 <sup>2</sup>                 | 0.04/27                   | 10                        |                                      |                                                                          |                                                        |
|                                           | May 2022     | USEC; 32.3°–41.7° N/69.1°–76.5° W            |          |                    |                  |      | 0.95               | 0.26               | 0.05               | 0.1                | 0.4                | 0.90                              | 0.55                         | 0.57                         | 0.64 <sup>2</sup>                 | 1.76/1174                 | 64                        |                                      |                                                                          |                                                        |
|                                           | Jun 2022     | Bermuda; 30.8°–35.9° N/59.5°–65.9° W         |          |                    |                  |      | 4.3                | 1.24               | 0.06               | 0.0                | 1.6                | 1.34                              | 0.90                         | 0.22                         | 1.35 <sup>2</sup>                 | 0.66/440                  | 25                        |                                      |                                                                          |                                                        |
| <b>Studies in open ocean environments</b> |              |                                              |          |                    |                  |      |                    |                    |                    |                    |                    |                                   |                              |                              |                                   |                           |                           |                                      |                                                                          |                                                        |
| Prospero (1979)                           | Jun-Aug 1975 | NWA; 34°–40° N/52°–60° W                     | Ship     | 15                 | < 30             | Mean | 4.41 <sup>3</sup>  |                    |                    |                    |                    |                                   |                              |                              |                                   |                           |                           | No                                   | SSA = 3.252 · Na <sup>+</sup>                                            |                                                        |
| Spada et al. (2015)                       | 1987–1996    | New Zealand; 41.3°–46.4° S/168.4° E–176.5° W | Surf     |                    | No upper limit   | Rng  | ~6–14              |                    |                    |                    |                    |                                   |                              |                              |                                   |                           |                           | No                                   | SSA = 1.47 · Na <sup>+</sup> + Cl <sup>-</sup>                           | Quinn and Bates (2005)                                 |
| Keene et al. (1990)                       | Jul-Sep 1988 | Bermuda                                      | Ship     | 10-m tower on ship | No upper limit   | Mean |                    |                    |                    |                    | 1.3                |                                   |                              |                              |                                   | 0.68/454                  |                           |                                      | Multiplies Na <sup>+</sup> by ratio in seawater                          |                                                        |

|                             |                     |                                                     |              |         |                                   |      |                        |                       |                    |                        |                        |                        |                       |          |                                |                                                    |                                     |
|-----------------------------|---------------------|-----------------------------------------------------|--------------|---------|-----------------------------------|------|------------------------|-----------------------|--------------------|------------------------|------------------------|------------------------|-----------------------|----------|--------------------------------|----------------------------------------------------|-------------------------------------|
|                             |                     |                                                     | Air          | MB<br>L |                                   |      |                        |                       | 0.1<br>3           |                        |                        |                        |                       | 0.34/227 |                                |                                                    |                                     |
| Heintzenberg et al. (2000)  | 1990 - 1997         | 30°-45° N <sup>5</sup>                              | Ship and air | MB<br>L | N/A                               | Mean | ~6                     |                       |                    | ~3                     |                        |                        |                       |          | No                             | $SSA = 3.262 \cdot Na^+$                           | Wilson (1975)                       |
| Shinozuka et al. (2004)     | Nov-Dec 1995        | Tasmania; 135°-160° E/38°-57° S                     | Air          | < 200   | < 3.5/No upper limit <sup>6</sup> | Rng  | 0 - 8/9 - 40           |                       |                    |                        |                        |                        |                       |          | No                             | $SSA = 1.47 \cdot Na^+ + Cl^-$                     | Holland (1978); Quinn et al. (2001) |
| Keene and Savoie (1998)     | Apr-May 1996        | Bermuda; 32° N/64° W                                | Surf         | 28      | 0.5-5-17                          | Rng  |                        |                       | 3.4-2-8.26         | 0.10-                  | 1.36 <sup>6</sup>      |                        | 0.22 - 1.35/147 - 900 | No       | $SSA = 3.262 \cdot Na^+$       | Keene et al. (1986); Wilson (1975)                 |                                     |
| Quinn and Bates (2005)      | Nov-Dec 1995        | Southern Ocean south of Australia                   | Ship         | 18      | < 10                              | Mean | 0.77                   | BDL                   |                    | 0.03                   | BDL                    | 0.01                   |                       | No       | $SSA = 1.47 \cdot Na^+ + Cl^-$ |                                                    |                                     |
|                             | Jun-Jul 1997        | Sub-tropical northeast Atlantic                     |              |         |                                   |      | 0.30                   | BDL                   |                    | 0.20                   | 0.08                   | 0.03                   |                       |          |                                |                                                    |                                     |
|                             | Jan-Feb 1999        | Tropical Atlantic                                   |              |         |                                   |      | 0.38/0.43 <sup>8</sup> | BDL/0.01 <sup>8</sup> |                    | 0.01/0.08 <sup>8</sup> | 0.02/0.06 <sup>8</sup> | 0.00/0.01 <sup>8</sup> |                       |          |                                |                                                    |                                     |
| Quinn et al. (2001)         | Jan-Feb 1999        | Northern hemisphere <sup>9</sup>                    | Ship         | 18      | < 1.1/1.1 - 10                    | Mean | 0.22/8.00              | 0.00/0.01             |                    | 0.15/<0.00             | 0.01/0.23              | 0.03/<0.00             |                       | No       | $SSA = 1.47 \cdot Na^+ + Cl^-$ | Holland (1978)                                     |                                     |
|                             |                     | Southern hemisphere <sup>9</sup>                    |              |         |                                   |      | 0.08/6.40              | 0.00/0.00             |                    | 0.52/0.07              | <0.00/0.19             | 0.05/<0.00             |                       |          |                                |                                                    |                                     |
|                             |                     | Southern hemisphere tropics <sup>9</sup>            |              |         |                                   |      | 0.14/9.5               | 0.00/0.00             |                    | 0.56/0.03              | <0.00/0.14             | 0.04/<0.00             |                       |          |                                |                                                    |                                     |
|                             |                     | Southern hemisphere marine temperature <sup>9</sup> |              |         |                                   |      |                        |                       |                    |                        |                        |                        |                       |          |                                |                                                    |                                     |
| Boreddy and Kawamura (2015) | Dec-Feb 2001 - 2012 | Chichijima Island; 27.1 °N /142.2 °E                | Surf         | 259     | No upper limit                    | Mean | 4.12                   | 0.05 <sup>10</sup>    | 0.12 <sup>10</sup> | 7.10                   | 3.06                   | 0.78                   | 0.19                  | 1.75     | Yes                            | Same system of equations as Eqs. 1-4 in this study |                                     |
|                             |                     |                                                     |              |         |                                   |      | 3.32                   | 0.05 <sup>10</sup>    | 0.30 <sup>10</sup> | 6.18                   | 2.97                   | 0.84                   | 0.23                  | 1.67     |                                |                                                    |                                     |



|                                     |                            |                                            |      |                    |                |            |                   |                                |                    |      |      |      |      |                                                  |                   |                                                 |                          |
|-------------------------------------|----------------------------|--------------------------------------------|------|--------------------|----------------|------------|-------------------|--------------------------------|--------------------|------|------|------|------|--------------------------------------------------|-------------------|-------------------------------------------------|--------------------------|
|                                     | Jun-Aug 2001               |                                            |      |                    |                |            | 2.52              | 0.02 <sub>0</sub> <sup>1</sup> | 0.04 <sup>10</sup> | 4.94 | 1.06 | 0.24 | 0.11 | 1.82 <sub>1</sub> <sup>1</sup>                   |                   |                                                 |                          |
|                                     | 2012                       |                                            |      |                    |                |            | 3.62              | 0.05 <sub>0</sub> <sup>1</sup> | 0.04 <sup>10</sup> | 7.12 | 1.31 | 0.43 | 0.11 | 1.98 <sub>1</sub> <sup>1</sup>                   |                   |                                                 |                          |
| Jiang et al. (2021)                 | Summer 2008 - 2016         | Northwest Pacific; 31°-51.3° N/122°-173° E | Ship | Top deck of ship   | Unspecified    | Rng (Mean) | 1.6 - 42.0 (11.7) |                                |                    |      |      |      |      |                                                  | No                | SSA = 3.256 · Na <sup>+</sup>                   | Riley and Chester (1976) |
| Feng et al. (2017)                  | Nov 2012/2013              | Yellow Sea and Bohai Sea                   | Ship |                    | 0.01 - 18      | Mean       | 3.8/4.0           |                                |                    |      |      |      |      | 8 % and 35 % for particles < 10 μm, respectively | No                | SSA = 3.26 · Na <sup>+</sup>                    | Manders et al. (2010)    |
|                                     | Mar-Apr 2014               | Yellow Sea and North Pacific               |      |                    |                |            | 4.0               |                                |                    |      |      |      |      |                                                  |                   |                                                 |                          |
|                                     | Mar-May 2015               |                                            |      |                    |                |            | 2.5               |                                |                    |      |      |      |      |                                                  |                   |                                                 |                          |
| Murphy et al. (2019)                | Jul-Aug 2016, Jan-Feb 2017 | 30°-45° N over Pacific Ocean               | Air  | 160 - 150          | 0.18 - 3       | Rng        | -0.5 - 2.5        |                                |                    |      |      |      |      |                                                  | Yes <sup>12</sup> | Method using ion mass spectra                   |                          |
| <b>Studies in coastal locations</b> |                            |                                            |      |                    |                |            |                   |                                |                    |      |      |      |      |                                                  |                   |                                                 |                          |
| Keene et al. (1990)                 | Jul-Sep 1988               | USEC                                       | Ship | 10-m tower on ship | No upper limit | Mean       |                   |                                |                    | 4.04 |      |      |      | 1.11/740                                         | No                | Multiplies Na <sup>+</sup> by ratio in seawater |                          |
|                                     |                            |                                            | Air  | MBL                |                |            |                   |                                |                    | 0.45 |      |      |      | 0.79/527                                         |                   |                                                 |                          |

|                        |                              |                                                                         |      |                  |                   |                   |                                                                            |                                                             |                                                                            |                                                                            |                                                                            |                              |                     |                                                |                                                                                                              |                         |
|------------------------|------------------------------|-------------------------------------------------------------------------|------|------------------|-------------------|-------------------|----------------------------------------------------------------------------|-------------------------------------------------------------|----------------------------------------------------------------------------|----------------------------------------------------------------------------|----------------------------------------------------------------------------|------------------------------|---------------------|------------------------------------------------|--------------------------------------------------------------------------------------------------------------|-------------------------|
| Wai and Tanner (2004)  | 1995 - 1999                  | Hong Kong; 22.3° N/114.1° E                                             | Surf | 77               | < 10              | 1995 mean         | 2.32                                                                       |                                                             |                                                                            |                                                                            |                                                                            |                              |                     | Yes <sup>13</sup>                              | Uses Na <sup>+</sup> as indicator of SSA                                                                     |                         |
| Quinn et al. (2001)    | Jan-Feb 1999                 | USEC <sup>8</sup>                                                       | Ship | 18               | < 1.1/10          | Mean              | 0.12/9.20                                                                  | 0.02/<0.00                                                  | 2.40/0.09                                                                  | 0.04/2.30                                                                  | 0.54/<0.00                                                                 |                              | No                  | SSA = 1.47 · Na <sup>+</sup> + Cl <sup>-</sup> | Holland (1978)                                                                                               |                         |
| Quinn and Bates (2005) | Jan-Mar 1999<br>Mar-Apr 2001 | Northern Indian Ocean East coast of Japan, Sea of Japan, East China Sea | Ship | 18               | < 10              | Means             | 0.25/0.08 <sub>4</sub> <sup>1</sup><br>0.08/0.06 <sub>5</sub> <sup>1</sup> | BDL/0.01 <sub>4</sub> <sup>1</sup><br>BDL/BDL <sub>15</sub> | 0.05/0.25 <sub>4</sub> <sup>1</sup><br>0.15/0.07 <sub>5</sub> <sup>1</sup> | 0.04/0.07 <sub>4</sub> <sup>1</sup><br>0.07/0.03 <sub>5</sub> <sup>1</sup> | 0.01/0.05 <sub>4</sub> <sup>1</sup><br>0.05/0.02 <sub>5</sub> <sup>1</sup> |                              |                     | SSA = 1.47 · Na <sup>+</sup> + Cl <sup>-</sup> |                                                                                                              |                         |
|                        | Jul-Aug 2002                 | USEC; 33°-45° N                                                         |      |                  |                   |                   | 0.04                                                                       | BDL                                                         | 0.17                                                                       | 0.03                                                                       | 0.05                                                                       | 0.4 (< 1 μm)/0.8 (1 - 10 μm) |                     |                                                |                                                                                                              |                         |
| Keene et al. (2004)    | Jul-Aug 2002                 | USEC; 33°-44° N/68°-80° W                                               | Ship | 18               | <25               | Median            |                                                                            |                                                             | 0.19                                                                       | 3.48                                                                       | 0.79                                                                       | 0.57                         | 86                  | N/A                                            | Uses Mg <sup>2+</sup> as reference for SSA                                                                   | Keene et al. (1986)     |
| Nolte et al. (2008)    | May-Jun 2002                 | Tampa, Florida, USA; ~27.9° N, 82.5° W                                  | Surf | Unspecified      | 0.056 - 0.18      | Mean or rng       | 1.41                                                                       |                                                             | 1.6/6                                                                      | 3.76 <sub>6</sub> <sup>1</sup>                                             | 1.74                                                                       | 1.19                         | 48                  | No                                             | Cl <sup>-</sup> depletion (%) determined by deficit of Cl <sup>-</sup> /Na <sup>+</sup> ratio from 1.17      | Stumm and Morgan (1981) |
| Yao and Zhang (2012)   | Jun-Jul, Oct-Nov 2002        | Kejimikujik, Nova Scotia; 44.4° N /65.2° W                              | Surf | 5 m above ground | 3.1 - 6.2         | Rng sum mer/fall  | 0.05 - 0.22/0.03 - 0.24                                                    |                                                             |                                                                            |                                                                            |                                                                            |                              | 8 - 10/0 - 55       | No                                             | Uses Cl <sup>-</sup> :Na <sup>+</sup> ratio of 1.174 in sea water to determine Cl <sup>-</sup> depletion (%) | Zhuang et al. (1999)    |
|                        | Nov 2002 <sup>17</sup>       |                                                                         |      |                  | 0.048 - 0.18      | Rng <1 μm /> 1 μm | BDL - 0.07/0.72                                                            |                                                             | 1.04 - 2.92/0.11                                                           | 0.02 - 0.18/0.69                                                           | 0.31 - 0.91/0.02                                                           |                              |                     |                                                |                                                                                                              |                         |
| Keene et al. (2007)    | Jul-Aug 2004                 | Appledore Island, Maine, USA;                                           | Surf | 43               | 0.39 - 18/No supp | Med or rng        | 0.68                                                                       |                                                             | 0.5/0                                                                      | 2.33/0.96                                                                  | 2.35/0.26                                                                  | 0.80                         | 0.00 - 1.31/0 - 874 | No <sup>19</sup>                               | Uses Na <sup>+</sup> and Mg <sup>2+</sup> to determine SSA                                                   | Keene et al. (1986)     |

|                            |                                                                                          |                                                                |                    |                   |                                        |                              |           |             |      |                        |                                      |              |              |                         |         |                   |                                                                                                     |                                                                                                                                                 |
|----------------------------|------------------------------------------------------------------------------------------|----------------------------------------------------------------|--------------------|-------------------|----------------------------------------|------------------------------|-----------|-------------|------|------------------------|--------------------------------------|--------------|--------------|-------------------------|---------|-------------------|-----------------------------------------------------------------------------------------------------|-------------------------------------------------------------------------------------------------------------------------------------------------|
| Zhao and Gao (2008)        | Jul-Sep 2006                                                                             | 42.9° N/70.6° W<br>Newark, New Jersey, USA;<br>40.7° N/74.2° W | Surf               | 20 m above ground | er limit <sup>18</sup><br>0.056 – 0.18 | Mean or mg                   |           |             |      |                        |                                      |              |              | 0.33 – 1.21             | 14 – 96 | Yes <sup>20</sup> | For samples with Na <sup>+</sup> :Mg <sup>2+</sup> >5, Na <sup>+</sup> is reference species for SSA | Finlayson-Pitts and Pitts (2000)                                                                                                                |
| Corral et al. (2021)       | Dec-Feb 2014 – 2018<br>Mar-May 2014 – 2018<br>Jun-Aug 2014 – 2018<br>Sep-Nov 2014 – 2018 | USEC; 25.4°–44.4° N/70.0°–82.1° W                              | Surf <sup>21</sup> | -3 - 157          | < 2.5                                  | Rng of means across stations | 0.24-1.15 |             |      |                        |                                      |              |              |                         |         | N/A               | SSA = 1.81 · Cl <sup>-</sup>                                                                        | <a href="http://vista.cira.colostate.edu/Improve/reconstructed-fine-mass/">http://vista.cira.colostate.edu/Improve/reconstructed-fine-mass/</a> |
| Haskins et al. (2018)      | Feb-Mar 2015                                                                             | USEC; ~28°–43° N/68°–85° W                                     | Air                | < 100             | < 4.1                                  | Med                          |           |             |      | Over ocean: 0.28 – 0.2 | Over land: 0.12 – 0.15 <sup>22</sup> |              |              | 0.30/202                | 0.08/53 | No                | Na <sup>+</sup> and Cl <sup>-</sup> are assumed to come exclusively from SSA                        | Junge and Werby (1958)                                                                                                                          |
| Kloppe et al. (2020)       | Feb 2016 – Dec 2017                                                                      | Henties Bay, Namibia                                           | Surf               | 30                | < 10                                   | Mean                         | 10.2      | 0.41        | 0.73 | 13.9                   | 3.60 <sup>23</sup>                   | 0.23         | 0.21         | 1.35 (2016)/1.34 (2017) |         | Yes               | Similar system of equations as Eqs.1-4 in this study                                                | Seinfeld and Pandis (2016)                                                                                                                      |
| Azadi Aghdam et al. (2019) | Jul-Dec 2018<br>Aug 2005 – Oct 2007                                                      | Quezon City, Philippines;<br>14.6° N/121.1° E                  | Surf               | 85                | 0.056 - 0.18                           | Rng of means                 | 0.1 – 2.6 | 0.20 – 1.48 |      |                        | 2.03 – 3.12/0.31                     | 0.17 – 0.35/ | 0.32 – 0.59/ |                         | 21 – 91 | Yes               | Same as Eqs. 1-4, 15, 16 in this study;<br>SSA = $ssNa^+ + Cl^-$                                    | Becagli et al. (2005); Boreddy and Kawamura (2015); Farren et al. (2019)                                                                        |



88 <sup>11</sup>These Cl<sup>-</sup>:Na<sup>+</sup> ratios are higher than those typically found in sea salt particles. Boreddy and Kawamura (2015) note that non-sea salt  
89 sources of Cl<sup>-</sup> contributed to their samples in summer (June – August) and fall (September – November).  
90 <sup>12</sup>Particles containing aluminum, barium, and other metals were deemed to not be sea salt particles and excluded from the analysis in  
91 Murphy et al. (2019).  
92 <sup>13</sup>Wai and Tanner (2004) reported they “carefully examined their dataset” and determined there was negligible contribution of local  
93 non-sea salt sources of Na<sup>+</sup> (e.g., crustal, granitic) to total Na<sup>+</sup>.  
94 <sup>14</sup>In the northern Indian Ocean, air masses were categorized as having recent (<2 days) contact with either the Arabian or Indian  
95 continent. Mean values for a given parameter are reported as A/B, where A and B correspond to values associated with air masses from  
96 the Arabian and Indian continent, respectively.  
97 <sup>15</sup>On the east coast of Japan, Sea of Japan, and East China Sea, air masses were categorized as having recent (<2 days) contact with  
98 either (i) Asian continental regions with known sources of pollution or (ii) Asian continental regions with known sources of pollution  
99 and dust. Mean values for a given parameter are reported as A/B, where A and B correspond to values associated with air masses likely  
100 affected by (i) Asian pollution and (ii) Asian pollution and dust, respectively.  
101 <sup>16</sup>Nolte et al. (2008) reported total SO<sub>4</sub><sup>2-</sup> instead of nssSO<sub>4</sub><sup>2-</sup>.  
102 <sup>17</sup>Yao and Zhang (2012) provided speciated sub- and supermicron mass concentrations for three samples collected in November 2002  
103 that had substantially high mass concentrations of Na<sup>+</sup>, nssSO<sub>4</sub><sup>2-</sup>, NO<sub>3</sub><sup>-</sup>, and NH<sub>4</sub><sup>+</sup>.  
104 <sup>18</sup>Aerosols were sampled using a cascade impactor (0.39 – 18 μm) as well as in bulk where no upper size limit is specified. Cl<sup>-</sup> and NO<sub>3</sub><sup>-</sup>  
105 mass concentrations correspond to the sum across all impactor stages, while Na<sup>+</sup> and nssSO<sub>4</sub><sup>2-</sup> mass concentrations correspond to the  
106 bulk samples.  
107 <sup>19</sup>Keene et al. (2007) found good agreement between their measured ratios of Na<sup>+</sup> to Mg<sup>2+</sup> to those documented for sea salt. They  
108 proceeded assuming all Na<sup>+</sup> and Mg<sup>2+</sup> originated from the surface ocean.  
109 <sup>20</sup>Zhao and Gao (2008) used Na<sup>+</sup>:Mg<sup>2+</sup> ratios to categorize samples as either from marine-dominated (Group 1; >5) or continental-  
110 dominated (Group 2; < 5) air masses. Calculations and discussion regarding Cl<sup>-</sup> depletion only consider data from Group 1.  
111 <sup>21</sup>Stations operated through the United States Environmental Protection Agency (U.S. EPA) Interagency Monitoring of Protected Visual  
112 Environments (IMPROVE) network.  
113 <sup>22</sup>Haskins et al. (2018) provided day and night median Cl<sup>-</sup> mass concentrations for over ocean and over land. Above, we combine the  
114 day and night medians as a range.  
115 <sup>23</sup>Klopper et al. (2020) reported total SO<sub>4</sub><sup>2-</sup> instead of nssSO<sub>4</sub><sup>2-</sup>.  
116 <sup>24</sup>Bondy et al. (2017) note particles identified and analyzed as sea salt were unlikely to be influenced by dust as they had negligible  
117 amounts of soil elements, such as Si and Al. Samples from July 4 and 5 were excluded to eliminate influence from fireworks.

118 **Table S5.** Number of data points considered in Figs. 1, 4, and S6 for each of the parameters  
 119 presented for each of the seasonal/monthly categories.

| <b>Parameter</b>                                                   | <b>Dec-Feb</b> | <b>Mar</b> | <b>Mar transit</b> | <b>May</b> | <b>May transit</b> | <b>Jun Bermuda</b> |
|--------------------------------------------------------------------|----------------|------------|--------------------|------------|--------------------|--------------------|
| Temperature                                                        | 105781         | 83108      | 12806              | 34175      | 27427              | 19807              |
| Relative humidity                                                  | 105846         | 83098      | 12805              | 34175      | 27421              | 19803              |
| Water vapor mixing ratio                                           | 105846         | 83098      | 12805              | 34175      | 27421              | 19803              |
| Wind speed                                                         | 75483          | 58823      | 7994               | 19826      | 12955              | 6477               |
| CO                                                                 | 75523          | 58407      | 8545               | 23799      | 18745              | 10946              |
| Na <sup>+</sup>                                                    | 275            | 246        | 48                 | 113        | 106                | 81                 |
| K <sup>+</sup>                                                     | 218            | 217        | 47                 | 60         | 43                 | 52                 |
| Ca <sup>2+</sup>                                                   | 235            | 244        | 48                 | 73         | 81                 | 67                 |
| Cl <sup>-</sup>                                                    | 268            | 230        | 43                 | 43         | 65                 | 78                 |
| Cl <sup>-</sup> :Na <sup>+</sup>                                   | 258            | 227        | 43                 | 43         | 65                 | 77                 |
| K <sup>+</sup> :Na <sup>+</sup>                                    | 185            | 208        | 47                 | 58         | 41                 | 52                 |
| Ca <sup>2+</sup> :Na <sup>+</sup>                                  | 202            | 220        | 48                 | 64         | 75                 | 66                 |
| SO <sub>4</sub> <sup>2-</sup>                                      | 342            | 276        | 48                 | 136        | 116                | 81                 |
| NO <sub>3</sub> <sup>-</sup>                                       | 322            | 269        | 48                 | 137        | 119                | 83                 |
| Oxalate                                                            | 263            | 227        | 43                 | 137        | 120                | 82                 |
| NH <sub>4</sub> <sup>+</sup>                                       | 2748           | 2385       | 403                | 1169       | 947                | 678                |
| Excess acidic species                                              | 1372           | 1790       | 423                | 468        | 373                | 486                |
| ssNa <sup>+</sup>                                                  | 202            | 220        | 48                 | 64         | 75                 | 66                 |
| Cl <sup>-</sup> :ssNa <sup>+</sup>                                 | 154            | 175        | 36                 | 33         | 52                 | 63                 |
| Lost Cl <sup>-</sup> attributed to ExSO <sub>4</sub> <sup>2-</sup> | 1258           | 1748       | 418                | 391        | 323                | 466                |
| Lost Cl <sup>-</sup> attributed to ExNO <sub>3</sub> <sup>-</sup>  | 1212           | 1733       | 418                | 391        | 323                | 466                |
| Lost Cl <sup>-</sup> attributed to oxalate                         | 263            | 227        | 43                 | 137        | 120                | 82                 |
| Lost Cl <sup>-</sup> based on ssNa <sup>+</sup>                    | 190            | 206        | 43                 | 33         | 53                 | 64                 |
| Lost Cl <sup>-</sup> attributed to excess acidic species           | 1385           | 1794       | 423                | 468        | 373                | 487                |
| ExSO <sub>4</sub> <sup>2-</sup>                                    | 1258           | 1748       | 418                | 391        | 323                | 466                |
| ExNO <sub>3</sub> <sup>-</sup>                                     | 1212           | 1733       | 418                | 391        | 323                | 466                |
| <i>m/z</i> 44                                                      | 2748           | 2385       | 403                | 1169       | 947                | 678                |
| <i>m/z</i> 79                                                      | 2748           | 2385       | 403                | 1169       | 947                | 678                |

120

121 **Table S6.** Seasonal/monthly median values for each of the parameters presented in Figs. 1, 4, and  
 122 S6. Recall the median is represented as a solid red line in the center of each box.

| <b>Parameter</b>                                                   | <b>Units</b>       | <b>Dec-Feb</b> | <b>Mar</b> | <b>Mar transit</b> | <b>May</b> | <b>May transit</b> | <b>Jun Bermuda</b> |
|--------------------------------------------------------------------|--------------------|----------------|------------|--------------------|------------|--------------------|--------------------|
| Temperature                                                        | °C                 | 2.7            | 9.2        | 13.3               | 19.9       | 19.2               | 21.9               |
| Relative humidity                                                  | %                  | 52.6           | 50.5       | 46.6               | 64.2       | 61.6               | 80.8               |
| Water vapor mixing ratio                                           | ppm                | 3607.38        | 5585.31    | 6868.43            | 15798.90   | 15681.40           | 21605.40           |
| Wind speed                                                         | m s <sup>-1</sup>  | 8.926          | 10.266     | 8.617              | 8.355      | 6.710              | 6.425              |
| CO                                                                 | ppm                | 0.1332         | 0.1404     | 0.1408             | 0.1246     | 0.1214             | 0.0813             |
| Na <sup>+</sup>                                                    | μg m <sup>-3</sup> | 0.25           | 0.27       | 0.75               | 0.26       | 0.46               | 1.24               |
| K <sup>+</sup>                                                     |                    | 0.04           | 0.07       | 0.09               | 0.05       | 0.03               | 0.06               |
| Ca <sup>2+</sup>                                                   |                    | 0.06           | 0.13       | 0.14               | 0.12       | 0.05               | 0.07               |
| Cl <sup>-</sup>                                                    |                    | 0.32           | 0.43       | 1.33               | 0.46       | 0.31               | 1.68               |
| Cl <sup>-</sup> :Na <sup>+</sup>                                   |                    | 1.443          | 1.309      | 1.376              | 0.391      | 0.456              | 1.310              |
| K <sup>+</sup> :Na <sup>+</sup>                                    | -                  | 0.132          | 0.267      | 0.119              | 0.065      | 0.020              | 0.037              |
| Ca <sup>2+</sup> :Na <sup>+</sup>                                  | -                  | 0.261          | 0.412      | 0.219              | 0.233      | 0.075              | 0.050              |
| SO <sub>4</sub> <sup>2-</sup>                                      | μg m <sup>-3</sup> | 0.63           | 0.74       | 1.08               | 0.53       | 0.72               | 1.63               |
| NO <sub>3</sub> <sup>-</sup>                                       |                    | 0.49           | 0.81       | 0.77               | 0.55       | 0.74               | 0.90               |
| Oxalate                                                            |                    | 0.01           | 0.01       | 0.01               | 0.04       | 0.03               | 0.02               |
| NH <sub>4</sub> <sup>+</sup>                                       |                    | 0.28           | 0.38       | 0.46               | 0.58       | 0.56               | 0.24               |
| Excess acidic species                                              |                    | 0.30           | 0.57       | 0.36               | 0.05       | 0.44               | 1.82               |
| ssNa <sup>+</sup>                                                  | -                  | 0.19           | 0.20       | 0.71               | 0.29       | 0.63               | 1.32               |
| Cl <sup>-</sup> :ssNa <sup>+</sup>                                 | -                  | 1.536          | 1.560      | 1.617              | 0.645      | 0.471              | 1.354              |
| Lost Cl <sup>-</sup> attributed to ExSO <sub>4</sub> <sup>2-</sup> | μg m <sup>-3</sup> | 0.00           | 0.00       | 0.00               | 0.00       | 0.00               | 0.46               |
| Lost Cl <sup>-</sup> attributed to ExNO <sub>3</sub> <sup>-</sup>  |                    | 0.13           | 0.29       | 0.18               | 0.00       | 0.42               | 0.58               |
| Lost Cl <sup>-</sup> attributed to oxalate                         |                    | 0.01           | 0.01       | 0.01               | 0.03       | 0.03               | 0.02               |
| Lost Cl <sup>-</sup> based on ssNa <sup>+</sup>                    |                    | 0.04           | 0.04       | 0.11               | 1.76       | 1.33               | 0.66               |
| Lost Cl <sup>-</sup> attributed to excess acidic species           |                    | 0.17           | 0.34       | 0.21               | 0.04       | 0.26               | 1.14               |
| ExSO <sub>4</sub> <sup>2-</sup>                                    |                    | 0.00           | 0.00       | 0.00               | 0.00       | 0.00               | 0.63               |
| ExNO <sub>3</sub> <sup>-</sup>                                     |                    | 0.24           | 0.51       | 0.32               | 0.00       | 0.74               | 1.02               |
| <i>m/z</i> 44                                                      |                    | 0.11           | 0.22       | 0.38               | 0.46       | 0.41               | 0.03               |
| <i>m/z</i> 79                                                      |                    | 0.01           | 0.02       | 0.03               | 0.03       | 0.02               | 0.01               |

123

124

125 **Table S7.** Dates, quantity of samples, meteorological conditions, and derived contributions of sea  
 126 salt and dust to bulk PILS  $\text{Na}^+$  ( $\text{ssNa}^+$  and  $\text{Na}^+_{\text{dust}}$ , respectively) and  $\text{Ca}^{2+}$  ( $\text{ssCa}^{2+}$  and  $\text{Ca}^{2+}_{\text{dust}}$ ,  
 127 respectively) mass concentrations for research flights (RFs) considered in each category. “N PILS  
 128 samples” refers to the total number of PILS samples collected during clear conditions on the date  
 129 indicated, while “N samples w/ derived species” refers to the number of these samples providing  
 130 enough information to solve Eqs. 1 – 4 (i.e., samples providing mass concentrations of both  $\text{Na}^+_{\text{bulk}}$   
 131 and  $\text{Ca}^{2+}_{\text{bulk}}$ ).

| Category         | Date             | RF(s)    | N PILS samples | N samples w/ derived species | Meteorological conditions and/or relevant notes               | Median $\text{ssNa}^+$ ( $\mu\text{g m}^{-3}$ ) | Median $\text{Na}^+_{\text{dust}}$ ( $\mu\text{g m}^{-3}$ ) | Median $\text{ssCa}^{2+}$ ( $\mu\text{g m}^{-3}$ ) | Median $\text{Ca}^{2+}_{\text{dust}}$ ( $\mu\text{g m}^{-3}$ ) |
|------------------|------------------|----------|----------------|------------------------------|---------------------------------------------------------------|-------------------------------------------------|-------------------------------------------------------------|----------------------------------------------------|----------------------------------------------------------------|
| Dec-Feb          | 30 November 2021 | 94       | 7              | 7                            | Remains of post-frontal conditions                            | 0.00                                            | 0.14                                                        | 0.00                                               | 0.31                                                           |
|                  | 01 December 2021 | 95       | 16             | 16                           | Prefrontal, high pressure; smoke in boundary layer near coast | 0.03                                            | 0.23                                                        | 0.00                                               | 0.47                                                           |
|                  | 07 December 2021 | 96       | 5              | 5                            | Postfrontal, cold high pressure behind a strong cold front    | 0.07                                            | 0.11                                                        | 0.00                                               | 0.20                                                           |
|                  | 11 January 2022  | 100, 101 | 6              | 4                            | Cold high pressure, cold air outbreak (CAO) conditions        | 0.32                                            | 0.03                                                        | 0.01                                               | 0.07                                                           |
|                  | 12 January 2022  | 102, 103 | 33             | 17                           | Cold high pressure                                            | 0.09                                            | 0.01                                                        | 0.00                                               | 0.03                                                           |
|                  | 15 January 2022  | 104      | 3              | 2                            | Postfrontal                                                   | 0.67                                            | 0.02                                                        | 0.01                                               | 0.04                                                           |
|                  | 18 January 2022  | 105      | 11             | 0                            | Low pressure moves offshore, sets up CAO conditions           | NaN                                             | NaN                                                         | NaN                                                | NaN                                                            |
|                  | 19 January 2022  | 107, 108 | 26             | 6                            | Short-lived high pressure                                     | 0.28                                            | 0.04                                                        | 0.01                                               | 0.07                                                           |
|                  | 24 January 2022  | 109, 110 | 26             | 9                            | Postfrontal, weak high pressure                               | 0.16                                            | 0.04                                                        | 0.00                                               | 0.07                                                           |
|                  | 26 January 2022  | 111, 112 | 20             | 7                            | Postfrontal                                                   | 0.35                                            | 0.02                                                        | 0.01                                               | 0.04                                                           |
|                  | 27 January 2022  | 113, 114 | 18             | 5                            | Cold high pressure                                            | 0.24                                            | 0.00                                                        | 0.01                                               | 0.00                                                           |
| 01 February 2022 | 115              | 8        | 5              | High pressure                | 1.07                                                          | 0.01                                            | 0.03                                                        | 0.03                                               |                                                                |



|     |                        |             |            |            |                                                                                      |             |             |             |             |
|-----|------------------------|-------------|------------|------------|--------------------------------------------------------------------------------------|-------------|-------------|-------------|-------------|
|     | 02<br>February<br>2022 | 116         | 17         | 6          | High pressure                                                                        | 0.74        | 0.00        | 0.02        | 0.01        |
|     | 03<br>February<br>2022 | 117,<br>118 | 15         | 5          | High pressure                                                                        | 1.00        | 0.00        | 0.02        | 0.00        |
|     | 15<br>February<br>2022 | 120,<br>121 | 34         | 21         | Postfrontal conditions, cold<br>high pressure                                        | 0.22        | 0.01        | 0.00        | 0.02        |
|     | 16<br>February<br>2022 | 122,<br>123 | 21         | 18         | Cold high pressure                                                                   | 0.17        | 0.04        | 0.01        | 0.08        |
|     | 19<br>February<br>2022 | 124,<br>125 | 38         | 30         | Weak postfrontal                                                                     | 0.09        | 0.02        | 0.00        | 0.05        |
|     | 22<br>February<br>2022 | 126,<br>127 | 25         | 24         | Prefrontal, high pressure                                                            | 1.47        | 0.03        | 0.04        | 0.05        |
|     | 26<br>February<br>2022 | 128,<br>129 | 16         | 15         | Postfrontal                                                                          | 0.11        | 0.03        | 0.00        | 0.05        |
|     | <b>Overall</b>         |             | <b>345</b> | <b>202</b> |                                                                                      | <b>0.19</b> | <b>0.03</b> | <b>0.01</b> | <b>0.06</b> |
| Mar | 02 March<br>2022       | 130         | 39         | 36         | Postfrontal, high pressure                                                           | 0.19        | 0.08        | 0.01        | 0.15        |
|     | 03 March<br>2022       | 131,<br>132 | 71         | 57         | Weak prefrontal                                                                      | 0.71        | 0.13        | 0.03        | 0.26        |
|     | 04 March<br>2022       | 133,<br>134 | 42         | 37         | Cold high pressure                                                                   | 1.62        | 0.02        | 0.04        | 0.04        |
|     | 13 March<br>2022       | 138         | 8          | 6          | Postfrontal, CAO conditions                                                          | 0.05        | 0.03        | 0.00        | 0.06        |
|     | 14 March<br>2022       | 139,<br>140 | 38         | 36         | Late postfrontal, cold high<br>pressure; smoke plume<br>sampled from a woodland fire | 0.10        | 0.03        | 0.00        | 0.05        |
|     | 18 March<br>2022       | 141         | 14         | 12         | Weak postfrontal                                                                     | 0.13        | 0.02        | 0.00        | 0.03        |
|     | 26 March<br>2022       | 144,<br>145 | 29         | 19         | Postfrontal; sampled dust,<br>smoke, and potentially pollen                          | 0.02        | 0.02        | 0.00        | 0.04        |
|     | 28 March<br>2022       | 146         | 17         | 12         | Postfrontal                                                                          | 0.02        | 0.02        | 0.00        | 0.04        |
|     | 29 March<br>2022       | 147,<br>148 | 19         | 5          | Postfrontal, high pressure,<br>CAO conditions                                        | 0.06        | 0.03        | 0.00        | 0.05        |

|             |                |          |            |            |                                                                                                                  |             |             |             |             |
|-------------|----------------|----------|------------|------------|------------------------------------------------------------------------------------------------------------------|-------------|-------------|-------------|-------------|
|             | <b>Overall</b> |          | <b>277</b> | <b>220</b> |                                                                                                                  | <b>0.20</b> | <b>0.05</b> | <b>0.01</b> | <b>0.11</b> |
| May         | 03 May 2022    | 149      | 15         | 12         | Weak prefrontal; presence of smoke potentially from New Mexico                                                   | 0.36        | 0.07        | 0.01        | 0.13        |
|             | 05 May 2022    | 150, 151 | 18         | 11         | Postfrontal                                                                                                      | 0.03        | 0.02        | 0.00        | 0.04        |
|             | 16 May 2022    | 153, 154 | 39         | 7          | Prefrontal to an approaching cold front yet also postfrontal to a departing band of precipitation                | 0.11        | 0.14        | 0.00        | 0.26        |
|             | 17 May 2022    | 155      | 37         | 7          | Postfrontal                                                                                                      | 0.08        | 0.00        | 0.00        | 0.00        |
|             | 20 May 2022    | 158      | 28         | 27         | Warm high pressure, southerly flow due to Bermuda high <sup>2</sup> ; haze with potential sampling of bioaerosol | 1.77        | 0.04        | 0.06        | 0.08        |
|             | <b>Overall</b> |          | <b>137</b> | <b>64</b>  |                                                                                                                  | <b>0.29</b> | <b>0.03</b> | <b>0.01</b> | <b>0.07</b> |
| Mar transit | 22 March 2022  | 142, 143 | 48         | 48         | High pressure, two days after a cold front and two days before another cold front                                | 0.71        | 0.05        | 0.03        | 0.10        |
| May transit | 18 May 2022    | 156, 157 | 67         | 46         | Postfrontal along East Coast, aircraft passed across the cold front on the way to Bermuda                        | 0.58        | 0.01        | 0.02        | 0.02        |
|             | 21 May 2022    | 159, 160 | 42         | 24         | Warm high pressure, anticyclonic flow around Bermuda high                                                        | 0.72        | 0.01        | 0.02        | 0.02        |
|             | 31 May 2022    | 161      | 11         | 5          | Postfrontal                                                                                                      | 0.19        | 0.01        | 0.01        | 0.02        |
|             | <b>Overall</b> |          | <b>120</b> | <b>75</b>  |                                                                                                                  | <b>0.63</b> | <b>0.01</b> | <b>0.02</b> | <b>0.02</b> |
| Jun Bermuda | 02 June 2022   | 162, 163 | 4          | 3          | Prefrontal                                                                                                       | 0.83        | 0.00        | 0.01        | 0.00        |
|             | 03 June 2022   | 164      | 1          | 0          | Prefrontal, tropical system approaching from the southwest                                                       | NaN         | NaN         | NaN         | NaN         |
|             | 05 June 2022   | 165      | 29         | 26         | Could only fly in the morning due to approaching tropical cyclone (TC), TC departs 06 June 2022.                 | 1.94        | 0.00        | 0.07        | 0.00        |
|             | 07 June 2022   | 167      | 1          | 0          | High behind departing TC                                                                                         | NaN         | NaN         | NaN         | NaN         |
|             | 08 June 2022   | 168, 169 | 2          | 1          | High pressure behind TC, African dust known to be in domain                                                      | 5.63        | 0.48        | 0.21        | 0.86        |
|             | 10 June 2022   | 170      | 1          | 1          | High pressure, isolated thunderstorms, African dust known to be in domain                                        | 2.28        | 0.00        | 0.06        | 0.00        |

|  |                 |             |           |           |                                                                                                    |             |             |             |             |
|--|-----------------|-------------|-----------|-----------|----------------------------------------------------------------------------------------------------|-------------|-------------|-------------|-------------|
|  | 11 June<br>2022 | 172,<br>173 | 20        | 12        | High pressure, African dust<br>known to be in domain                                               | 0.63        | 0.08        | 0.02        | 0.18        |
|  | 13 June<br>2022 | 174         | 25        | 23        | High pressure, African dust<br>known to be in domain but<br>sampled away from dust for<br>contrast | 1.31        | 0.00        | 0.05        | 0.01        |
|  | <b>Overall</b>  |             | <b>83</b> | <b>66</b> |                                                                                                    | <b>1.32</b> | <b>0.01</b> | <b>0.05</b> | <b>0.01</b> |

132 <sup>1</sup>Davis et al. (1997)

133 **Table S8.** Dates, quantity of samples, meteorological conditions, and derived contributions of sea  
134 salt, dust, and combustion emissions to bulk PILS  $\text{Na}^+$  ( $\text{ssNa}^+$ ,  $\text{Na}^+_{\text{dust}}$ , and  $\text{Na}^+_{\text{comb}}$ , respectively)  
135 and  $\text{K}^+$  ( $\text{ssK}^+$ ,  $\text{K}^+_{\text{dust}}$ , and  $\text{K}^+_{\text{comb}}$ , respectively) for RFs considered in each category. Combustion  
136 emissions are assumed to not be a source of  $\text{Ca}^{2+}$ , so only contributions of sea salt and dust to bulk  
137 PILS  $\text{Ca}^{2+}$  mass concentrations are reported ( $\text{ssCa}^{2+}$  and  $\text{Ca}^{2+}_{\text{dust}}$ , respectively). Here, agricultural  
138 burning of herbaceous crop residue is considered as the only combustion process contributing to  
139  $\text{Na}^+_{\text{comb}}$  and  $\text{K}^+_{\text{comb}}$ . “N PILS samples” refers to the total number of PILS samples collected during  
140 clear conditions on the date indicated, while “N samples w/ derived species” refers to the number  
141 of these samples providing enough information to solve Eqs. 6 – 13 (i.e., samples providing mass  
142 concentrations of  $\text{Na}^+_{\text{bulk}}$ ,  $\text{Ca}^{2+}_{\text{bulk}}$ , and  $\text{K}^+_{\text{bulk}}$ ).

| Category        | Date             | RF(s)    | N PILS samples | N samples w/ derived species | Meteorological conditions and/or relevant notes               | Median $\text{ssNa}^+$ ( $\mu\text{g m}^{-3}$ ) | Median $\text{Na}^+_{\text{dust}}$ ( $\mu\text{g m}^{-3}$ ) | Median $\text{Na}^+_{\text{comb}}$ ( $\mu\text{g m}^{-3}$ ) | Median $\text{ssCa}^{2+}$ ( $\mu\text{g m}^{-3}$ ) | Median $\text{Ca}^{2+}_{\text{dust}}$ ( $\mu\text{g m}^{-3}$ ) | Median $\text{ssK}^+$ ( $\mu\text{g m}^{-3}$ ) | Median $\text{K}^+_{\text{dust}}$ ( $\mu\text{g m}^{-3}$ ) | Median $\text{K}^+_{\text{comb}}$ ( $\mu\text{g m}^{-3}$ ) |
|-----------------|------------------|----------|----------------|------------------------------|---------------------------------------------------------------|-------------------------------------------------|-------------------------------------------------------------|-------------------------------------------------------------|----------------------------------------------------|----------------------------------------------------------------|------------------------------------------------|------------------------------------------------------------|------------------------------------------------------------|
| Dec-Feb         | 30 November 2021 | 94       | 7              | 1                            | Remains of post-frontal conditions                            | 0.00                                            | 0.16                                                        | 0.00                                                        | 0.00                                               | 0.41                                                           | 0.00                                           | 0.06                                                       | 0.00                                                       |
|                 | 01 December 2021 | 95       | 16             | 14                           | Prefrontal, high pressure; smoke in boundary layer near coast | 0.08                                            | 0.23                                                        | 0.00                                                        | 0.00                                               | 0.48                                                           | 0.00                                           | 0.05                                                       | 0.00                                                       |
|                 | 07 December 2021 | 96       | 5              | 3                            | Postfrontal, cold high pressure behind a strong cold front    | 0.08                                            | 0.11                                                        | 0.00                                                        | 0.00                                               | 0.22                                                           | 0.00                                           | 0.03                                                       | 0.00                                                       |
|                 | 11 January 2022  | 100, 101 | 6              | 3                            | Cold high pressure, cold air outbreak (CAO) conditions        | 0.33                                            | 0.03                                                        | 0.00                                                        | 0.01                                               | 0.08                                                           | 0.01                                           | 0.01                                                       | 0.00                                                       |
|                 | 12 January 2022  | 102, 103 | 33             | 11                           | Cold high pressure                                            | 0.15                                            | 0.04                                                        | 0.00                                                        | 0.01                                               | 0.08                                                           | 0.00                                           | 0.02                                                       | 0.00                                                       |
|                 | 15 January 2022  | 104      | 3              | 2                            | Postfrontal                                                   | 0.67                                            | 0.02                                                        | 0.00                                                        | 0.01                                               | 0.04                                                           | 0.01                                           | 0.00                                                       | 0.00                                                       |
|                 | 18 January 2022  | 105      | 11             | 0                            | Low pressure moves offshore, sets up CAO conditions           | NaN                                             | NaN                                                         | NaN                                                         | NaN                                                | NaN                                                            | NaN                                            | NaN                                                        | NaN                                                        |
|                 | 19 January 2022  | 107, 108 | 26             | 6                            | Short-lived high pressure                                     | 0.28                                            | 0.04                                                        | 0.00                                                        | 0.01                                               | 0.07                                                           | 0.01                                           | 0.05                                                       | 0.06                                                       |
|                 | 24 January 2022  | 109, 110 | 26             | 9                            | Postfrontal, weak high pressure                               | 0.17                                            | 0.04                                                        | 0.00                                                        | 0.00                                               | 0.07                                                           | 0.01                                           | 0.05                                                       | 0.02                                                       |
| 26 January 2022 | 111, 112         | 20       | 7              | Postfrontal                  | 0.33                                                          | 0.02                                            | 0.01                                                        | 0.01                                                        | 0.04                                               | 0.01                                                           | 0.03                                           | 0.35                                                       |                                                            |

|     |                        |             |            |            |                                                                                            |             |             |             |             |             |             |             |             |
|-----|------------------------|-------------|------------|------------|--------------------------------------------------------------------------------------------|-------------|-------------|-------------|-------------|-------------|-------------|-------------|-------------|
|     | 27<br>January<br>2022  | 113,<br>114 | 18         | 4          | Cold high pressure                                                                         | 0.28        | 0.00        | 0.00        | 0.01        | 0.00        | 0.01        | 0.00        | 0.00        |
|     | 01<br>February<br>2022 | 115         | 8          | 4          | High pressure                                                                              | 1.08        | 0.01        | 0.00        | 0.02        | 0.03        | 0.02        | 0.00        | 0.00        |
|     | 02<br>February<br>2022 | 116         | 17         | 4          | High pressure                                                                              | 0.74        | 0.00        | 0.00        | 0.02        | 0.01        | 0.03        | 0.00        | 0.02        |
|     | 03<br>February<br>2022 | 117,<br>118 | 15         | 4          | High pressure                                                                              | 1.16        | 0.00        | 0.00        | 0.03        | 0.00        | 0.04        | 0.00        | 0.01        |
|     | 15<br>February<br>2022 | 120,<br>121 | 34         | 7          | Postfrontal<br>conditions, cold<br>high pressure                                           | 0.11        | 0.04        | 0.00        | 0.00        | 0.13        | 0.00        | 0.02        | 0.00        |
|     | 16<br>February<br>2022 | 122,<br>123 | 21         | 10         | Cold high pressure                                                                         | 0.13        | 0.06        | 0.00        | 0.00        | 0.12        | 0.00        | 0.04        | 0.00        |
|     | 19<br>February<br>2022 | 124,<br>125 | 38         | 18         | Weak postfrontal                                                                           | 0.06        | 0.02        | 0.00        | 0.00        | 0.11        | 0.00        | 0.04        | 0.00        |
|     | 22<br>February<br>2022 | 126,<br>127 | 25         | 20         | Prefrontal, high<br>pressure                                                               | 1.68        | 0.03        | 0.00        | 0.04        | 0.07        | 0.04        | 0.00        | 0.00        |
|     | 26<br>February<br>2022 | 128,<br>129 | 16         | 14         | Postfrontal                                                                                | 0.10        | 0.02        | 0.00        | 0.00        | 0.05        | 0.00        | 0.04        | 0.00        |
|     | <b>Overall</b>         |             | <b>345</b> | <b>141</b> |                                                                                            | <b>0.21</b> | <b>0.03</b> | <b>0.00</b> | <b>0.01</b> | <b>0.08</b> | <b>0.01</b> | <b>0.03</b> | <b>0.00</b> |
| Mar | 02 March<br>2022       | 130         | 39         | 30         | Postfrontal, high<br>pressure                                                              | 0.27        | 0.08        | 0.00        | 0.01        | 0.17        | 0.00        | 0.02        | 0.00        |
|     | 03 March<br>2022       | 131,<br>132 | 71         | 53         | Weak prefrontal                                                                            | 0.74        | 0.12        | 0.00        | 0.03        | 0.26        | 0.03        | 0.04        | 0.00        |
|     | 04 March<br>2022       | 133,<br>134 | 42         | 29         | Cold high pressure                                                                         | 1.64        | 0.02        | 0.00        | 0.06        | 0.05        | 0.06        | 0.01        | 0.00        |
|     | 13 March<br>2022       | 138         | 8          | 2          | Postfrontal, CAO<br>conditions                                                             | 0.00        | 0.11        | 0.00        | 0.00        | 0.59        | 0.00        | 0.08        | 0.00        |
|     | 14 March<br>2022       | 139,<br>140 | 38         | 32         | Late postfrontal,<br>cold high pressure;<br>smoke plume<br>sampled from a<br>woodland fire | 0.08        | 0.03        | 0.00        | 0.00        | 0.05        | 0.00        | 0.04        | 0.01        |
|     | 18 March<br>2022       | 141         | 14         | 12         | Weak postfrontal                                                                           | 0.12        | 0.02        | 0.00        | 0.00        | 0.03        | 0.00        | 0.03        | 0.07        |
|     | 26 March<br>2022       | 144,<br>145 | 29         | 15         | Postfrontal;<br>sampled dust,<br>smoke, and<br>potentially pollen                          | 0.02        | 0.02        | 0.00        | 0.00        | 0.05        | 0.00        | 0.04        | 0.01        |
|     | 28 March<br>2022       | 146         | 17         | 10         | Postfrontal                                                                                | 0.02        | 0.03        | 0.00        | 0.00        | 0.05        | 0.00        | 0.05        | 0.00        |

|             |                |          |            |            |                                                                                                                  |             |             |             |             |             |             |             |             |
|-------------|----------------|----------|------------|------------|------------------------------------------------------------------------------------------------------------------|-------------|-------------|-------------|-------------|-------------|-------------|-------------|-------------|
|             | 29 March 2022  | 147, 148 | 19         | 4          | Postfrontal, high pressure, CAO conditions                                                                       | 0.09        | 0.08        | 0.00        | 0.00        | 0.16        | 0.00        | 0.05        | 0.02        |
|             | <b>Overall</b> |          | <b>277</b> | <b>187</b> |                                                                                                                  | <b>0.22</b> | <b>0.05</b> | <b>0.00</b> | <b>0.01</b> | <b>0.12</b> | <b>0.01</b> | <b>0.03</b> | <b>0.00</b> |
| May         | 03 May 2022    | 149      | 15         | 10         | Weak prefrontal; presence of smoke potentially from New Mexico                                                   | 0.37        | 0.08        | 0.00        | 0.01        | 0.14        | 0.01        | 0.05        | 0.00        |
|             | 05 May 2022    | 150, 151 | 18         | 9          | Postfrontal                                                                                                      | 0.03        | 0.02        | 0.00        | 0.00        | 0.04        | 0.00        | 0.02        | 0.00        |
|             | 16 May 2022    | 153, 154 | 39         | 5          | Prefrontal to an approaching cold front yet also postfrontal to a departing band of precipitation                | 0.12        | 0.16        | 0.00        | 0.00        | 0.31        | 0.00        | 0.03        | 0.00        |
|             | 17 May 2022    | 155      | 37         | 2          | Postfrontal                                                                                                      | 0.06        | 0.00        | 0.00        | 0.00        | 0.01        | 0.00        | 0.01        | 0.00        |
|             | 20 May 2022    | 158      | 28         | 19         | Warm high pressure, southerly flow due to Bermuda high <sup>2</sup> ; haze with potential sampling of bioaerosol | 2.19        | 0.01        | 0.00        | 0.08        | 0.06        | 0.05        | 0.00        | 0.00        |
|             | <b>Overall</b> |          | <b>137</b> | <b>45</b>  |                                                                                                                  | <b>0.39</b> | <b>0.02</b> | <b>0.00</b> | <b>0.01</b> | <b>0.08</b> | <b>0.01</b> | <b>0.01</b> | <b>0.00</b> |
| Mar transit | 22 March 2022  | 142, 143 | 48         | 47         | High pressure, two days after a cold front and two days before another cold front                                | 0.74        | 0.04        | 0.00        | 0.03        | 0.10        | 0.01        | 0.06        | 0.00        |
| May transit | 18 May 2022    | 156, 157 | 67         | 23         | Postfrontal along East Coast, aircraft passed across the cold front on the way to Bermuda                        | 1.10        | 0.00        | 0.00        | 0.04        | 0.01        | 0.02        | 0.00        | 0.00        |
|             | 21 May 2022    | 159, 160 | 42         | 14         | Warm high pressure, anticyclonic flow around Bermuda high                                                        | 1.14        | 0.00        | 0.00        | 0.04        | 0.01        | 0.03        | 0.00        | 0.00        |
|             | 31 May 2022    | 161      | 11         | 1          | Postfrontal                                                                                                      | 0.18        | 0.01        | 0.01        | 0.01        | 0.02        | 0.01        | 0.02        | 0.20        |
|             | <b>Overall</b> |          | <b>120</b> | <b>38</b>  |                                                                                                                  | <b>1.07</b> | <b>0.00</b> | <b>0.00</b> | <b>0.04</b> | <b>0.01</b> | <b>0.02</b> | <b>0.00</b> | <b>0.00</b> |
| Jun Bermuda | 02 June 2022   | 162, 163 | 4          | 1          | Prefrontal                                                                                                       | 0.83        | 0.00        | 0.00        | 0.03        | 0.00        | 0.03        | 0.00        | 0.13        |
|             | 03 June 2022   | 164      | 1          | 0          | Prefrontal, tropical system approaching from the southwest                                                       | NaN         |
|             | 05 June 2022   | 165      | 29         | 24         | Could only fly in the morning due to approaching tropical cyclone                                                | 1.97        | 0.00        | 0.00        | 0.07        | 0.00        | 0.06        | 0.00        | 0.00        |

|  |                 |             |           |           |                                                                                                       |             |             |             |             |             |             |             |             |     |
|--|-----------------|-------------|-----------|-----------|-------------------------------------------------------------------------------------------------------|-------------|-------------|-------------|-------------|-------------|-------------|-------------|-------------|-----|
|  |                 |             |           |           | (TC), TC departs<br>06 June 2022.                                                                     |             |             |             |             |             |             |             |             |     |
|  | 07 June<br>2022 | 167         | 1         | 0         | High behind<br>departing TC                                                                           | NaN         | NaN |
|  | 08 June<br>2022 | 168,<br>169 | 2         | 1         | High pressure<br>behind TC, African<br>dust known to be in<br>domain                                  | 5.56        | 0.47        | 0.09        | 0.21        | 0.86        | 0.20        | 0.86        | 1.97        |     |
|  | 10 June<br>2022 | 170         | 1         | 1         | High pressure,<br>isolated<br>thunderstorms,<br>African dust known<br>to be in domain                 | 2.28        | 0.00        | 0.00        | 0.06        | 0.00        | 0.01        | 0.00        | 0.00        |     |
|  | 11 June<br>2022 | 172,<br>173 | 20        | 7         | High pressure,<br>African dust known<br>to be in domain                                               | 0.78        | 0.10        | 0.00        | 0.03        | 0.20        | 0.02        | 0.02        | 0.00        |     |
|  | 13 June<br>2022 | 174         | 25        | 17        | High pressure,<br>African dust known<br>to be in domain but<br>sampled away from<br>dust for contrast | 1.31        | 0.00        | 0.00        | 0.05        | 0.00        | 0.04        | 0.00        | 0.00        |     |
|  | <b>Overall</b>  |             | <b>83</b> | <b>51</b> |                                                                                                       | <b>1.38</b> | <b>0.00</b> | <b>0.00</b> | <b>0.05</b> | <b>0.01</b> | <b>0.04</b> | <b>0.00</b> | <b>0.00</b> |     |

143 <sup>1</sup>Davis et al. (1997)

144 **Table S9.** Same as Table S8, except forest fire burning of pinion and juniper trees is considered  
 145 as the only combustion process contributing to Na<sup>+</sup><sub>comb</sub> and K<sup>+</sup><sub>comb</sub>.

| Category         | Date             | RF(s)    | N PILS samples | N samples w/ derived species | Meteorological conditions and/or relevant notes               | Median ssNa <sup>+</sup> (µg m <sup>-3</sup> ) | Median Na <sup>+</sup> <sub>dust</sub> (µg m <sup>-3</sup> ) | Median Na <sup>+</sup> <sub>comb</sub> (µg m <sup>-3</sup> ) | Median ssCa <sup>2+</sup> (µg m <sup>-3</sup> ) | Median Ca <sup>2+</sup> <sub>dust</sub> (µg m <sup>-3</sup> ) | Median ssK <sup>+</sup> (µg m <sup>-3</sup> ) | Median K <sup>+</sup> <sub>dust</sub> (µg m <sup>-3</sup> ) | Median K <sup>+</sup> <sub>comb</sub> (µg m <sup>-3</sup> ) |
|------------------|------------------|----------|----------------|------------------------------|---------------------------------------------------------------|------------------------------------------------|--------------------------------------------------------------|--------------------------------------------------------------|-------------------------------------------------|---------------------------------------------------------------|-----------------------------------------------|-------------------------------------------------------------|-------------------------------------------------------------|
| Dec-Feb          | 30 November 2021 | 94       | 7              | 1                            | Remains of post-frontal conditions                            | 0.00                                           | 0.16                                                         | 0.00                                                         | 0.00                                            | 0.41                                                          | 0.00                                          | 0.06                                                        | 0.00                                                        |
|                  | 01 December 2021 | 95       | 16             | 14                           | Prefrontal, high pressure; smoke in boundary layer near coast | 0.11                                           | 0.21                                                         | 0.00                                                         | 0.00                                            | 0.48                                                          | 0.00                                          | 0.05                                                        | 0.00                                                        |
|                  | 07 December 2021 | 96       | 5              | 3                            | Postfrontal, cold high pressure behind a strong cold front    | 0.09                                           | 0.10                                                         | 0.00                                                         | 0.00                                            | 0.22                                                          | 0.00                                          | 0.03                                                        | 0.00                                                        |
|                  | 11 January 2022  | 100, 101 | 6              | 3                            | Cold high pressure, cold air outbreak (CAO) conditions        | 0.34                                           | 0.03                                                         | 0.00                                                         | 0.01                                            | 0.08                                                          | 0.01                                          | 0.01                                                        | 0.00                                                        |
|                  | 12 January 2022  | 102, 103 | 33             | 11                           | Cold high pressure                                            | 0.16                                           | 0.04                                                         | 0.00                                                         | 0.01                                            | 0.08                                                          | 0.00                                          | 0.02                                                        | 0.00                                                        |
|                  | 15 January 2022  | 104      | 3              | 2                            | Postfrontal                                                   | 0.67                                           | 0.02                                                         | 0.00                                                         | 0.01                                            | 0.04                                                          | 0.01                                          | 0.00                                                        | 0.00                                                        |
|                  | 18 January 2022  | 105      | 11             | 0                            | Low pressure moves offshore, sets up CAO conditions           | NaN                                            | NaN                                                          | NaN                                                          | NaN                                             | NaN                                                           | NaN                                           | NaN                                                         | NaN                                                         |
|                  | 19 January 2022  | 107, 108 | 26             | 6                            | Short-lived high pressure                                     | 0.27                                           | 0.04                                                         | 0.01                                                         | 0.01                                            | 0.07                                                          | 0.01                                          | 0.05                                                        | 0.06                                                        |
|                  | 24 January 2022  | 109, 110 | 26             | 9                            | Postfrontal, weak high pressure                               | 0.19                                           | 0.04                                                         | 0.00                                                         | 0.00                                            | 0.07                                                          | 0.01                                          | 0.05                                                        | 0.02                                                        |
|                  | 26 January 2022  | 111, 112 | 20             | 7                            | Postfrontal                                                   | 0.32                                           | 0.02                                                         | 0.04                                                         | 0.01                                            | 0.04                                                          | 0.01                                          | 0.03                                                        | 0.35                                                        |
|                  | 27 January 2022  | 113, 114 | 18             | 4                            | Cold high pressure                                            | 0.28                                           | 0.00                                                         | 0.00                                                         | 0.01                                            | 0.00                                                          | 0.01                                          | 0.00                                                        | 0.00                                                        |
|                  | 01 February 2022 | 115      | 8              | 4                            | High pressure                                                 | 1.09                                           | 0.01                                                         | 0.00                                                         | 0.02                                            | 0.03                                                          | 0.02                                          | 0.00                                                        | 0.00                                                        |
| 02 February 2022 | 116              | 17       | 4              | High pressure                | 0.74                                                          | 0.00                                           | 0.00                                                         | 0.02                                                         | 0.01                                            | 0.03                                                          | 0.00                                          | 0.02                                                        |                                                             |



|     |                  |          |            |            |                                                                                |             |             |             |             |             |             |             |             |
|-----|------------------|----------|------------|------------|--------------------------------------------------------------------------------|-------------|-------------|-------------|-------------|-------------|-------------|-------------|-------------|
|     | 03 February 2022 | 117, 118 | 15         | 4          | High pressure                                                                  | 1.16        | 0.00        | 0.00        | 0.03        | 0.00        | 0.04        | 0.00        | 0.01        |
|     | 15 February 2022 | 120, 121 | 34         | 7          | Postfrontal conditions, cold high pressure                                     | 0.15        | 0.04        | 0.00        | 0.01        | 0.13        | 0.01        | 0.02        | 0.00        |
|     | 16 February 2022 | 122, 123 | 21         | 10         | Cold high pressure                                                             | 0.14        | 0.05        | 0.00        | 0.01        | 0.12        | 0.00        | 0.04        | 0.00        |
|     | 19 February 2022 | 124, 125 | 38         | 18         | Weak postfrontal                                                               | 0.06        | 0.02        | 0.00        | 0.00        | 0.11        | 0.00        | 0.04        | 0.00        |
|     | 22 February 2022 | 126, 127 | 25         | 20         | Prefrontal, high pressure                                                      | 1.69        | 0.03        | 0.00        | 0.04        | 0.07        | 0.04        | 0.00        | 0.00        |
|     | 26 February 2022 | 128, 129 | 16         | 14         | Postfrontal                                                                    | 0.10        | 0.02        | 0.00        | 0.00        | 0.05        | 0.00        | 0.04        | 0.00        |
|     | <b>Overall</b>   |          | <b>345</b> | <b>141</b> |                                                                                | <b>0.21</b> | <b>0.03</b> | <b>0.00</b> | <b>0.01</b> | <b>0.08</b> | <b>0.01</b> | <b>0.03</b> | <b>0.00</b> |
| Mar | 02 March 2022    | 130      | 39         | 30         | Postfrontal, high pressure                                                     | 0.27        | 0.07        | 0.00        | 0.01        | 0.17        | 0.00        | 0.02        | 0.00        |
|     | 03 March 2022    | 131, 132 | 71         | 53         | Weak prefrontal                                                                | 0.76        | 0.11        | 0.00        | 0.03        | 0.26        | 0.03        | 0.04        | 0.00        |
|     | 04 March 2022    | 133, 134 | 42         | 29         | Cold high pressure                                                             | 1.65        | 0.01        | 0.00        | 0.06        | 0.05        | 0.06        | 0.01        | 0.00        |
|     | 13 March 2022    | 138      | 8          | 2          | Postfrontal, CAO conditions                                                    | 0.00        | 0.11        | 0.00        | 0.00        | 0.59        | 0.00        | 0.08        | 0.00        |
|     | 14 March 2022    | 139, 140 | 38         | 32         | Late postfrontal, cold high pressure; smoke plume sampled from a woodland fire | 0.08        | 0.03        | 0.00        | 0.00        | 0.05        | 0.00        | 0.04        | 0.01        |
|     | 18 March 2022    | 141      | 14         | 12         | Weak postfrontal                                                               | 0.12        | 0.02        | 0.01        | 0.00        | 0.03        | 0.00        | 0.03        | 0.07        |
|     | 26 March 2022    | 144, 145 | 29         | 15         | Postfrontal; sampled dust, smoke, and potentially pollen                       | 0.02        | 0.02        | 0.00        | 0.00        | 0.05        | 0.00        | 0.04        | 0.01        |
|     | 28 March 2022    | 146      | 17         | 10         | Postfrontal                                                                    | 0.01        | 0.03        | 0.00        | 0.00        | 0.05        | 0.00        | 0.05        | 0.00        |
|     | 29 March 2022    | 147, 148 | 19         | 4          | Postfrontal, high pressure, CAO conditions                                     | 0.09        | 0.08        | 0.00        | 0.00        | 0.16        | 0.00        | 0.05        | 0.02        |
|     | <b>Overall</b>   |          | <b>277</b> | <b>187</b> |                                                                                | <b>0.23</b> | <b>0.05</b> | <b>0.00</b> | <b>0.01</b> | <b>0.12</b> | <b>0.01</b> | <b>0.03</b> | <b>0.00</b> |
| May | 03 May 2022      | 149      | 15         | 10         | Weak prefrontal; presence of smoke potentially from New Mexico                 | 0.38        | 0.07        | 0.00        | 0.01        | 0.14        | 0.01        | 0.05        | 0.00        |

|             |                |          |            |           |                                                                                                                  |             |             |             |             |             |             |             |             |
|-------------|----------------|----------|------------|-----------|------------------------------------------------------------------------------------------------------------------|-------------|-------------|-------------|-------------|-------------|-------------|-------------|-------------|
|             | 05 May 2022    | 150, 151 | 18         | 9         | Postfrontal                                                                                                      | 0.03        | 0.02        | 0.00        | 0.00        | 0.04        | 0.00        | 0.02        | 0.00        |
|             | 16 May 2022    | 153, 154 | 39         | 5         | Prefrontal to an approaching cold front yet also postfrontal to a departing band of precipitation                | 0.13        | 0.15        | 0.00        | 0.00        | 0.31        | 0.00        | 0.03        | 0.00        |
|             | 17 May 2022    | 155      | 37         | 2         | Postfrontal                                                                                                      | 0.06        | 0.00        | 0.00        | 0.00        | 0.01        | 0.00        | 0.01        | 0.00        |
|             | 20 May 2022    | 158      | 28         | 19        | Warm high pressure, southerly flow due to Bermuda high <sup>2</sup> ; haze with potential sampling of bioaerosol | 2.21        | 0.00        | 0.00        | 0.08        | 0.06        | 0.06        | 0.00        | 0.00        |
|             | <b>Overall</b> |          | <b>137</b> | <b>45</b> |                                                                                                                  | <b>0.41</b> | <b>0.02</b> | <b>0.00</b> | <b>0.01</b> | <b>0.08</b> | <b>0.01</b> | <b>0.01</b> | <b>0.00</b> |
| Mar transit | 22 March 2022  | 142, 143 | 48         | 47        | High pressure, two days after a cold front and two days before another cold front                                | 0.75        | 0.04        | 0.00        | 0.03        | 0.10        | 0.01        | 0.06        | 0.00        |
|             | 18 May 2022    | 156, 157 | 67         | 23        | Postfrontal along East Coast, aircraft passed across the cold front on the way to Bermuda                        | 1.11        | 0.00        | 0.00        | 0.04        | 0.01        | 0.02        | 0.00        | 0.00        |
| May transit | 21 May 2022    | 159, 160 | 42         | 14        | Warm high pressure, anticyclonic flow around Bermuda high                                                        | 1.14        | 0.00        | 0.00        | 0.04        | 0.01        | 0.03        | 0.00        | 0.00        |
|             | 31 May 2022    | 161      | 11         | 1         | Postfrontal                                                                                                      | 0.17        | 0.01        | 0.02        | 0.01        | 0.02        | 0.01        | 0.02        | 0.20        |
|             | <b>Overall</b> |          | <b>120</b> | <b>38</b> |                                                                                                                  | <b>1.08</b> | <b>0.00</b> | <b>0.00</b> | <b>0.04</b> | <b>0.01</b> | <b>0.02</b> | <b>0.00</b> | <b>0.00</b> |
|             | 02 June 2022   | 162, 163 | 4          | 1         | Prefrontal                                                                                                       | 0.82        | 0.00        | 0.01        | 0.03        | 0.00        | 0.03        | 0.00        | 0.13        |
|             | 03 June 2022   | 164      | 1          | 0         | Prefrontal, tropical system approaching from the southwest                                                       | NaN         |
| Jun Bermuda | 05 June 2022   | 165      | 29         | 24        | Could only fly in the morning due to approaching tropical cyclone (TC), TC departs 06 June 2022.                 | 1.97        | 0.00        | 0.00        | 0.07        | 0.00        | 0.06        | 0.00        | 0.00        |
|             | 07 June 2022   | 167      | 1          | 0         | High behind departing TC                                                                                         | NaN         |
|             | 08 June 2022   | 168, 169 | 2          | 1         | High pressure behind TC, African dust known to be in domain                                                      | 5.47        | 0.45        | 0.20        | 0.21        | 0.87        | 0.20        | 0.87        | 1.97        |

|  |                |          |           |           |                                                                                           |             |             |             |             |             |             |             |             |
|--|----------------|----------|-----------|-----------|-------------------------------------------------------------------------------------------|-------------|-------------|-------------|-------------|-------------|-------------|-------------|-------------|
|  | 10 June 2022   | 170      | 1         | 1         | High pressure, isolated thunderstorms, African dust known to be in domain                 | 2.28        | 0.00        | 0.00        | 0.06        | 0.00        | 0.01        | 0.00        | 0.00        |
|  | 11 June 2022   | 172, 173 | 20        | 7         | High pressure, African dust known to be in domain                                         | 0.80        | 0.09        | 0.00        | 0.03        | 0.20        | 0.02        | 0.01        | 0.00        |
|  | 13 June 2022   | 174      | 25        | 17        | High pressure, African dust known to be in domain but sampled away from dust for contrast | 1.32        | 0.00        | 0.00        | 0.05        | 0.00        | 0.04        | 0.00        | 0.00        |
|  | <b>Overall</b> |          | <b>83</b> | <b>51</b> |                                                                                           | <b>1.38</b> | <b>0.00</b> | <b>0.00</b> | <b>0.05</b> | <b>0.01</b> | <b>0.04</b> | <b>0.00</b> | <b>0.00</b> |

146 <sup>1</sup>Davis et al. (1997)

147 **Table S10.** Same as Table S8, except industrial operations (i.e., those at steel mills and cement  
 148 plants) are considered as the only combustion process contributing to Na<sup>+</sup><sub>comb</sub> and K<sup>+</sup><sub>comb</sub>.

| Category         | Date             | RF(s)    | N PILS samples | N samples w/ derived species | Meteorological conditions and/or relevant notes               | Median ssNa <sup>+</sup> (µg m <sup>-3</sup> ) | Median Na <sup>+</sup> <sub>dust</sub> (µg m <sup>-3</sup> ) | Median Na <sup>+</sup> <sub>comb</sub> (µg m <sup>-3</sup> ) | Median ssCa <sup>2+</sup> (µg m <sup>-3</sup> ) | Median Ca <sup>2+</sup> <sub>dust</sub> (µg m <sup>-3</sup> ) | Median ssK <sup>+</sup> (µg m <sup>-3</sup> ) | Median K <sup>+</sup> <sub>dust</sub> (µg m <sup>-3</sup> ) | Median K <sup>+</sup> <sub>comb</sub> (µg m <sup>-3</sup> ) |
|------------------|------------------|----------|----------------|------------------------------|---------------------------------------------------------------|------------------------------------------------|--------------------------------------------------------------|--------------------------------------------------------------|-------------------------------------------------|---------------------------------------------------------------|-----------------------------------------------|-------------------------------------------------------------|-------------------------------------------------------------|
| Dec-Feb          | 30 November 2021 | 94       | 7              | 1                            | Remains of post-frontal conditions                            | 0.01                                           | 0.14                                                         | 0.00                                                         | 0.00                                            | 0.41                                                          | 0.00                                          | 0.06                                                        | 0.00                                                        |
|                  | 01 December 2021 | 95       | 16             | 14                           | Prefrontal, high pressure; smoke in boundary layer near coast | 0.18                                           | 0.16                                                         | 0.00                                                         | 0.01                                            | 0.48                                                          | 0.01                                          | 0.05                                                        | 0.00                                                        |
|                  | 07 December 2021 | 96       | 5              | 3                            | Postfrontal, cold high pressure behind a strong cold front    | 0.12                                           | 0.07                                                         | 0.00                                                         | 0.00                                            | 0.22                                                          | 0.00                                          | 0.02                                                        | 0.00                                                        |
|                  | 11 January 2022  | 100, 101 | 6              | 3                            | Cold high pressure, cold air outbreak (CAO) conditions        | 0.35                                           | 0.03                                                         | 0.00                                                         | 0.01                                            | 0.08                                                          | 0.01                                          | 0.01                                                        | 0.00                                                        |
|                  | 12 January 2022  | 102, 103 | 33             | 11                           | Cold high pressure                                            | 0.16                                           | 0.03                                                         | 0.00                                                         | 0.01                                            | 0.08                                                          | 0.00                                          | 0.02                                                        | 0.00                                                        |
|                  | 15 January 2022  | 104      | 3              | 2                            | Postfrontal                                                   | 0.68                                           | 0.01                                                         | 0.00                                                         | 0.01                                            | 0.04                                                          | 0.01                                          | 0.00                                                        | 0.00                                                        |
|                  | 18 January 2022  | 105      | 11             | 0                            | Low pressure moves offshore, sets up CAO conditions           | NaN                                            | NaN                                                          | NaN                                                          | NaN                                             | NaN                                                           | NaN                                           | NaN                                                         | NaN                                                         |
|                  | 19 January 2022  | 107, 108 | 26             | 6                            | Short-lived high pressure                                     | 0.26                                           | 0.03                                                         | 0.02                                                         | 0.01                                            | 0.07                                                          | 0.01                                          | 0.05                                                        | 0.06                                                        |
|                  | 24 January 2022  | 109, 110 | 26             | 9                            | Postfrontal, weak high pressure                               | 0.22                                           | 0.04                                                         | 0.00                                                         | 0.00                                            | 0.08                                                          | 0.01                                          | 0.05                                                        | 0.02                                                        |
|                  | 26 January 2022  | 111, 112 | 20             | 7                            | Postfrontal                                                   | 0.27                                           | 0.01                                                         | 0.09                                                         | 0.01                                            | 0.04                                                          | 0.01                                          | 0.04                                                        | 0.35                                                        |
|                  | 27 January 2022  | 113, 114 | 18             | 4                            | Cold high pressure                                            | 0.28                                           | 0.00                                                         | 0.00                                                         | 0.01                                            | 0.00                                                          | 0.01                                          | 0.00                                                        | 0.00                                                        |
|                  | 01 February 2022 | 115      | 8              | 4                            | High pressure                                                 | 1.10                                           | 0.00                                                         | 0.00                                                         | 0.02                                            | 0.03                                                          | 0.02                                          | 0.00                                                        | 0.00                                                        |
| 02 February 2022 | 116              | 17       | 4              | High pressure                | 0.75                                                          | 0.00                                           | 0.00                                                         | 0.02                                                         | 0.01                                            | 0.03                                                          | 0.00                                          | 0.02                                                        |                                                             |

|     |                  |          |            |            |                                                                                |             |             |             |             |             |             |             |             |
|-----|------------------|----------|------------|------------|--------------------------------------------------------------------------------|-------------|-------------|-------------|-------------|-------------|-------------|-------------|-------------|
|     | 03 February 2022 | 117, 118 | 15         | 4          | High pressure                                                                  | 1.16        | 0.00        | 0.00        | 0.03        | 0.00        | 0.04        | 0.00        | 0.01        |
|     | 15 February 2022 | 120, 121 | 34         | 7          | Postfrontal conditions, cold high pressure                                     | 0.23        | 0.04        | 0.00        | 0.01        | 0.13        | 0.01        | 0.01        | 0.00        |
|     | 16 February 2022 | 122, 123 | 21         | 10         | Cold high pressure                                                             | 0.15        | 0.04        | 0.00        | 0.01        | 0.12        | 0.00        | 0.04        | 0.00        |
|     | 19 February 2022 | 124, 125 | 38         | 18         | Weak postfrontal                                                               | 0.06        | 0.02        | 0.00        | 0.00        | 0.11        | 0.00        | 0.04        | 0.00        |
|     | 22 February 2022 | 126, 127 | 25         | 20         | Prefrontal, high pressure                                                      | 1.73        | 0.00        | 0.00        | 0.05        | 0.07        | 0.04        | 0.00        | 0.00        |
|     | 26 February 2022 | 128, 129 | 16         | 14         | Postfrontal                                                                    | 0.09        | 0.02        | 0.00        | 0.00        | 0.05        | 0.00        | 0.04        | 0.00        |
|     | <b>Overall</b>   |          | <b>345</b> | <b>141</b> |                                                                                | <b>0.23</b> | <b>0.02</b> | <b>0.00</b> | <b>0.01</b> | <b>0.08</b> | <b>0.01</b> | <b>0.03</b> | <b>0.00</b> |
| Mar | 02 March 2022    | 130      | 39         | 30         | Postfrontal, high pressure                                                     | 0.29        | 0.04        | 0.00        | 0.01        | 0.17        | 0.00        | 0.02        | 0.00        |
|     | 03 March 2022    | 131, 132 | 71         | 53         | Weak prefrontal                                                                | 0.81        | 0.07        | 0.00        | 0.03        | 0.26        | 0.03        | 0.04        | 0.00        |
|     | 04 March 2022    | 133, 134 | 42         | 29         | Cold high pressure                                                             | 1.66        | 0.00        | 0.00        | 0.06        | 0.05        | 0.06        | 0.01        | 0.00        |
|     | 13 March 2022    | 138      | 8          | 2          | Postfrontal, CAO conditions                                                    | 0.00        | 0.11        | 0.00        | 0.00        | 0.59        | 0.00        | 0.08        | 0.00        |
|     | 14 March 2022    | 139, 140 | 38         | 32         | Late postfrontal, cold high pressure; smoke plume sampled from a woodland fire | 0.09        | 0.03        | 0.00        | 0.00        | 0.05        | 0.00        | 0.04        | 0.01        |
|     | 18 March 2022    | 141      | 14         | 12         | Weak postfrontal                                                               | 0.11        | 0.02        | 0.02        | 0.00        | 0.03        | 0.00        | 0.03        | 0.07        |
|     | 26 March 2022    | 144, 145 | 29         | 15         | Postfrontal; sampled dust, smoke, and potentially pollen                       | 0.02        | 0.02        | 0.00        | 0.00        | 0.05        | 0.00        | 0.04        | 0.01        |
|     | 28 March 2022    | 146      | 17         | 10         | Postfrontal                                                                    | 0.01        | 0.03        | 0.00        | 0.00        | 0.05        | 0.00        | 0.05        | 0.00        |
|     | 29 March 2022    | 147, 148 | 19         | 4          | Postfrontal, high pressure, CAO conditions                                     | 0.10        | 0.07        | 0.01        | 0.00        | 0.16        | 0.00        | 0.05        | 0.02        |
|     | <b>Overall</b>   |          | <b>277</b> | <b>187</b> |                                                                                | <b>0.22</b> | <b>0.03</b> | <b>0.00</b> | <b>0.01</b> | <b>0.12</b> | <b>0.01</b> | <b>0.03</b> | <b>0.00</b> |
| May | 03 May 2022      | 149      | 15         | 10         | Weak prefrontal; presence of smoke potentially from New Mexico                 | 0.41        | 0.06        | 0.00        | 0.01        | 0.14        | 0.01        | 0.05        | 0.00        |

|             |                |          |            |           |                                                                                                                  |             |             |             |             |             |             |             |             |
|-------------|----------------|----------|------------|-----------|------------------------------------------------------------------------------------------------------------------|-------------|-------------|-------------|-------------|-------------|-------------|-------------|-------------|
|             | 05 May 2022    | 150, 151 | 18         | 9         | Postfrontal                                                                                                      | 0.03        | 0.02        | 0.00        | 0.00        | 0.04        | 0.00        | 0.03        | 0.00        |
|             | 16 May 2022    | 153, 154 | 39         | 5         | Prefrontal to an approaching cold front yet also postfrontal to a departing band of precipitation                | 0.16        | 0.10        | 0.00        | 0.01        | 0.31        | 0.01        | 0.03        | 0.00        |
|             | 17 May 2022    | 155      | 37         | 2         | Postfrontal                                                                                                      | 0.06        | 0.00        | 0.00        | 0.00        | 0.01        | 0.00        | 0.01        | 0.00        |
|             | 20 May 2022    | 158      | 28         | 19        | Warm high pressure, southerly flow due to Bermuda high <sup>2</sup> ; haze with potential sampling of bioaerosol | 2.24        | 0.00        | 0.00        | 0.08        | 0.06        | 0.06        | 0.00        | 0.00        |
|             | <b>Overall</b> |          | <b>137</b> | <b>45</b> |                                                                                                                  | <b>0.45</b> | <b>0.01</b> | <b>0.00</b> | <b>0.01</b> | <b>0.08</b> | <b>0.01</b> | <b>0.01</b> | <b>0.00</b> |
| Mar transit | 22 March 2022  | 142, 143 | 48         | 47        | High pressure, two days after a cold front and two days before another cold front                                | 0.77        | 0.02        | 0.00        | 0.03        | 0.10        | 0.01        | 0.06        | 0.00        |
|             | 18 May 2022    | 156, 157 | 67         | 23        | Postfrontal along East Coast, aircraft passed across the cold front on the way to Bermuda                        | 1.11        | 0.00        | 0.00        | 0.04        | 0.01        | 0.02        | 0.00        | 0.00        |
| May transit | 21 May 2022    | 159, 160 | 42         | 14        | Warm high pressure, anticyclonic flow around Bermuda high                                                        | 1.14        | 0.00        | 0.00        | 0.04        | 0.01        | 0.03        | 0.00        | 0.00        |
|             | 31 May 2022    | 161      | 11         | 1         | Postfrontal                                                                                                      | 0.14        | 0.01        | 0.05        | 0.01        | 0.02        | 0.01        | 0.02        | 0.20        |
|             | <b>Overall</b> |          | <b>120</b> | <b>38</b> |                                                                                                                  | <b>1.08</b> | <b>0.00</b> | <b>0.00</b> | <b>0.04</b> | <b>0.01</b> | <b>0.02</b> | <b>0.00</b> | <b>0.00</b> |
|             | 02 June 2022   | 162, 163 | 4          | 1         | Prefrontal                                                                                                       | 0.81        | 0.00        | 0.02        | 0.03        | 0.00        | 0.03        | 0.00        | 0.13        |
|             | 03 June 2022   | 164      | 1          | 0         | Prefrontal, tropical system approaching from the southwest                                                       | NaN         |
| Jun Bermuda | 05 June 2022   | 165      | 29         | 24        | Could only fly in the morning due to approaching tropical cyclone (TC), TC departs 06 June 2022.                 | 1.97        | 0.00        | 0.00        | 0.07        | 0.00        | 0.06        | 0.00        | 0.00        |
|             | 07 June 2022   | 167      | 1          | 0         | High behind departing TC                                                                                         | NaN         |
|             | 08 June 2022   | 168, 169 | 2          | 1         | High pressure behind TC, African dust known to be in domain                                                      | 5.24        | 0.39        | 0.48        | 0.20        | 0.88        | 0.19        | 0.88        | 1.97        |

|  |                |          |           |           |                                                                                           |             |             |             |             |             |             |             |             |
|--|----------------|----------|-----------|-----------|-------------------------------------------------------------------------------------------|-------------|-------------|-------------|-------------|-------------|-------------|-------------|-------------|
|  | 10 June 2022   | 170      | 1         | 1         | High pressure, isolated thunderstorms, African dust known to be in domain                 | 2.28        | 0.00        | 0.00        | 0.06        | 0.00        | 0.01        | 0.00        | 0.00        |
|  | 11 June 2022   | 172, 173 | 20        | 7         | High pressure, African dust known to be in domain                                         | 0.83        | 0.06        | 0.00        | 0.03        | 0.20        | 0.02        | 0.01        | 0.00        |
|  | 13 June 2022   | 174      | 25        | 17        | High pressure, African dust known to be in domain but sampled away from dust for contrast | 1.35        | 0.00        | 0.00        | 0.05        | 0.00        | 0.04        | 0.00        | 0.00        |
|  | <b>Overall</b> |          | <b>83</b> | <b>51</b> |                                                                                           | <b>1.38</b> | <b>0.00</b> | <b>0.00</b> | <b>0.05</b> | <b>0.01</b> | <b>0.04</b> | <b>0.00</b> | <b>0.00</b> |

149 <sup>1</sup>Davis et al. (1997)

150 **Table S11.** Same as Table S8, except inefficient batch combustion in a sauna stove is considered  
 151 as the only combustion process contributing to Na<sup>+</sup><sub>comb</sub> and K<sup>+</sup><sub>comb</sub>.

| Category | Date             | RF(s)    | N PILS samples | N samples w/ derived species | Meteorological conditions and/or relevant notes               | Median ssNa <sup>+</sup> (µg m <sup>-3</sup> ) | Median Na <sup>+</sup> <sub>dust</sub> (µg m <sup>-3</sup> ) | Median Na <sup>+</sup> <sub>comb</sub> (µg m <sup>-3</sup> ) | Median ssCa <sup>2+</sup> (µg m <sup>-3</sup> ) | Median Ca <sup>2+</sup> <sub>dust</sub> (µg m <sup>-3</sup> ) | Median ssK <sup>+</sup> (µg m <sup>-3</sup> ) | Median K <sup>+</sup> <sub>dust</sub> (µg m <sup>-3</sup> ) | Median K <sup>+</sup> <sub>comb</sub> (µg m <sup>-3</sup> ) |
|----------|------------------|----------|----------------|------------------------------|---------------------------------------------------------------|------------------------------------------------|--------------------------------------------------------------|--------------------------------------------------------------|-------------------------------------------------|---------------------------------------------------------------|-----------------------------------------------|-------------------------------------------------------------|-------------------------------------------------------------|
| Dec-Feb  | 30 November 2021 | 94       | 7              | 1                            | Remains of post-frontal conditions                            | 0.16                                           | 0.00                                                         | 0.00                                                         | 0.01                                            | 0.40                                                          | 0.01                                          | 0.06                                                        | 0.00                                                        |
|          | 01 December 2021 | 95       | 16             | 14                           | Prefrontal, high pressure; smoke in boundary layer near coast | 0.35                                           | 0.00                                                         | 0.00                                                         | 0.01                                            | 0.47                                                          | 0.01                                          | 0.05                                                        | 0.00                                                        |
|          | 07 December 2021 | 96       | 5              | 3                            | Postfrontal, cold high pressure behind a strong cold front    | 0.19                                           | 0.00                                                         | 0.00                                                         | 0.01                                            | 0.22                                                          | 0.01                                          | 0.02                                                        | 0.00                                                        |
|          | 11 January 2022  | 100, 101 | 6              | 3                            | Cold high pressure, cold air outbreak (CAO) conditions        | 0.36                                           | 0.00                                                         | 0.00                                                         | 0.01                                            | 0.08                                                          | 0.01                                          | 0.01                                                        | 0.00                                                        |
|          | 12 January 2022  | 102, 103 | 33             | 11                           | Cold high pressure                                            | 0.21                                           | 0.00                                                         | 0.00                                                         | 0.01                                            | 0.08                                                          | 0.00                                          | 0.02                                                        | 0.00                                                        |
|          | 15 January 2022  | 104      | 3              | 2                            | Postfrontal                                                   | 0.69                                           | 0.00                                                         | 0.00                                                         | 0.01                                            | 0.04                                                          | 0.01                                          | 0.00                                                        | 0.00                                                        |
|          | 18 January 2022  | 105      | 11             | 0                            | Low pressure moves offshore, sets up CAO conditions           | NaN                                            | NaN                                                          | NaN                                                          | NaN                                             | NaN                                                           | NaN                                           | NaN                                                         | NaN                                                         |
|          | 19 January 2022  | 107, 108 | 26             | 6                            | Short-lived high pressure                                     | 0.22                                           | 0.02                                                         | 0.05                                                         | 0.01                                            | 0.07                                                          | 0.01                                          | 0.06                                                        | 0.06                                                        |
|          | 24 January 2022  | 109, 110 | 26             | 9                            | Postfrontal, weak high pressure                               | 0.07                                           | 0.00                                                         | 0.01                                                         | 0.00                                            | 0.09                                                          | 0.00                                          | 0.05                                                        | 0.02                                                        |
|          | 26 January 2022  | 111, 112 | 20             | 7                            | Postfrontal                                                   | 0.12                                           | 0.00                                                         | 0.27                                                         | 0.00                                            | 0.04                                                          | 0.00                                          | 0.04                                                        | 0.35                                                        |
|          | 27 January 2022  | 113, 114 | 18             | 4                            | Cold high pressure                                            | 0.28                                           | 0.00                                                         | 0.00                                                         | 0.01                                            | 0.00                                                          | 0.01                                          | 0.00                                                        | 0.00                                                        |
|          | 01 February 2022 | 115      | 8              | 4                            | High pressure                                                 | 1.10                                           | 0.00                                                         | 0.00                                                         | 0.02                                            | 0.03                                                          | 0.02                                          | 0.00                                                        | 0.00                                                        |
|          | 02 February 2022 | 116      | 17             | 4                            | High pressure                                                 | 0.74                                           | 0.00                                                         | 0.00                                                         | 0.02                                            | 0.01                                                          | 0.03                                          | 0.00                                                        | 0.02                                                        |



|     |                        |             |            |            |                                                                                            |             |             |             |             |             |             |             |             |
|-----|------------------------|-------------|------------|------------|--------------------------------------------------------------------------------------------|-------------|-------------|-------------|-------------|-------------|-------------|-------------|-------------|
|     | 03<br>February<br>2022 | 117,<br>118 | 15         | 4          | High pressure                                                                              | 1.16        | 0.00        | 0.00        | 0.03        | 0.00        | 0.04        | 0.00        | 0.01        |
|     | 15<br>February<br>2022 | 120,<br>121 | 34         | 7          | Postfrontal<br>conditions, cold<br>high pressure                                           | 0.31        | 0.00        | 0.00        | 0.01        | 0.13        | 0.01        | 0.01        | 0.00        |
|     | 16<br>February<br>2022 | 122,<br>123 | 21         | 10         | Cold high pressure                                                                         | 0.23        | 0.00        | 0.00        | 0.01        | 0.12        | 0.01        | 0.03        | 0.00        |
|     | 19<br>February<br>2022 | 124,<br>125 | 38         | 18         | Weak postfrontal                                                                           | 0.08        | 0.01        | 0.00        | 0.00        | 0.11        | 0.00        | 0.04        | 0.00        |
|     | 22<br>February<br>2022 | 126,<br>127 | 25         | 20         | Prefrontal, high<br>pressure                                                               | 1.73        | 0.00        | 0.00        | 0.05        | 0.07        | 0.04        | 0.00        | 0.00        |
|     | 26<br>February<br>2022 | 128,<br>129 | 16         | 14         | Postfrontal                                                                                | 0.10        | 0.01        | 0.00        | 0.00        | 0.05        | 0.00        | 0.04        | 0.00        |
|     | <b>Overall</b>         |             | <b>345</b> | <b>141</b> |                                                                                            | <b>0.24</b> | <b>0.00</b> | <b>0.00</b> | <b>0.01</b> | <b>0.08</b> | <b>0.01</b> | <b>0.02</b> | <b>0.00</b> |
|     | 02 March<br>2022       | 130         | 39         | 30         | Postfrontal, high<br>pressure                                                              | 0.31        | 0.00        | 0.00        | 0.01        | 0.17        | 0.01        | 0.01        | 0.00        |
|     | 03 March<br>2022       | 131,<br>132 | 71         | 53         | Weak prefrontal                                                                            | 0.86        | 0.00        | 0.00        | 0.03        | 0.26        | 0.03        | 0.03        | 0.00        |
|     | 04 March<br>2022       | 133,<br>134 | 42         | 29         | Cold high pressure                                                                         | 1.51        | 0.00        | 0.00        | 0.05        | 0.05        | 0.05        | 0.01        | 0.00        |
|     | 13 March<br>2022       | 138         | 8          | 2          | Postfrontal, CAO<br>conditions                                                             | 0.11        | 0.00        | 0.00        | 0.00        | 0.59        | 0.00        | 0.08        | 0.00        |
|     | 14 March<br>2022       | 139,<br>140 | 38         | 32         | Late postfrontal,<br>cold high pressure;<br>smoke plume<br>sampled from a<br>woodland fire | 0.08        | 0.01        | 0.01        | 0.00        | 0.06        | 0.00        | 0.04        | 0.01        |
| Mar | 18 March<br>2022       | 141         | 14         | 12         | Weak postfrontal                                                                           | 0.10        | 0.01        | 0.05        | 0.00        | 0.04        | 0.00        | 0.04        | 0.07        |
|     | 26 March<br>2022       | 144,<br>145 | 29         | 15         | Postfrontal;<br>sampled dust,<br>smoke, and<br>potentially pollen                          | 0.03        | 0.02        | 0.01        | 0.00        | 0.05        | 0.00        | 0.04        | 0.01        |
|     | 28 March<br>2022       | 146         | 17         | 10         | Postfrontal                                                                                | 0.05        | 0.00        | 0.00        | 0.00        | 0.05        | 0.00        | 0.04        | 0.00        |
|     | 29 March<br>2022       | 147,<br>148 | 19         | 4          | Postfrontal, high<br>pressure, CAO<br>conditions                                           | 0.12        | 0.03        | 0.02        | 0.00        | 0.15        | 0.00        | 0.05        | 0.02        |
|     | <b>Overall</b>         |             | <b>277</b> | <b>187</b> |                                                                                            | <b>0.25</b> | <b>0.00</b> | <b>0.00</b> | <b>0.01</b> | <b>0.12</b> | <b>0.01</b> | <b>0.03</b> | <b>0.00</b> |
| May | 03 May<br>2022         | 149         | 15         | 10         | Weak prefrontal;<br>presence of smoke<br>potentially from<br>New Mexico                    | 0.43        | 0.00        | 0.00        | 0.01        | 0.14        | 0.02        | 0.05        | 0.00        |

|             |                |          |            |           |                                                                                                                  |             |             |             |             |             |             |             |             |
|-------------|----------------|----------|------------|-----------|------------------------------------------------------------------------------------------------------------------|-------------|-------------|-------------|-------------|-------------|-------------|-------------|-------------|
|             | 05 May 2022    | 150, 151 | 18         | 9         | Postfrontal                                                                                                      | 0.02        | 0.00        | 0.00        | 0.00        | 0.05        | 0.00        | 0.03        | 0.00        |
|             | 16 May 2022    | 153, 154 | 39         | 5         | Prefrontal to an approaching cold front yet also postfrontal to a departing band of precipitation                | 0.26        | 0.00        | 0.00        | 0.01        | 0.31        | 0.01        | 0.02        | 0.00        |
|             | 17 May 2022    | 155      | 37         | 2         | Postfrontal                                                                                                      | 0.06        | 0.00        | 0.00        | 0.00        | 0.01        | 0.00        | 0.01        | 0.00        |
|             | 20 May 2022    | 158      | 28         | 19        | Warm high pressure, southerly flow due to Bermuda high <sup>2</sup> ; haze with potential sampling of bioaerosol | 2.24        | 0.00        | 0.00        | 0.08        | 0.06        | 0.06        | 0.00        | 0.00        |
|             | <b>Overall</b> |          | <b>137</b> | <b>45</b> |                                                                                                                  | <b>0.45</b> | <b>0.00</b> | <b>0.00</b> | <b>0.02</b> | <b>0.08</b> | <b>0.01</b> | <b>0.01</b> | <b>0.00</b> |
| Mar transit | 22 March 2022  | 142, 143 | 48         | 47        | High pressure, two days after a cold front and two days before another cold front                                | 0.72        | 0.00        | 0.00        | 0.03        | 0.10        | 0.02        | 0.05        | 0.00        |
|             | 18 May 2022    | 156, 157 | 67         | 23        | Postfrontal along East Coast, aircraft passed across the cold front on the way to Bermuda                        | 1.11        | 0.00        | 0.00        | 0.04        | 0.01        | 0.02        | 0.00        | 0.00        |
| May transit | 21 May 2022    | 159, 160 | 42         | 14        | Warm high pressure, anticyclonic flow around Bermuda high                                                        | 1.14        | 0.00        | 0.00        | 0.04        | 0.01        | 0.03        | 0.00        | 0.00        |
|             | 31 May 2022    | 161      | 11         | 1         | Postfrontal                                                                                                      | 0.04        | 0.01        | 0.15        | 0.00        | 0.02        | 0.00        | 0.02        | 0.20        |
|             | <b>Overall</b> |          | <b>120</b> | <b>38</b> |                                                                                                                  | <b>1.08</b> | <b>0.00</b> | <b>0.00</b> | <b>0.04</b> | <b>0.01</b> | <b>0.02</b> | <b>0.00</b> | <b>0.00</b> |
|             | 02 June 2022   | 162, 163 | 4          | 1         | Prefrontal                                                                                                       | 0.77        | 0.00        | 0.05        | 0.03        | 0.00        | 0.03        | 0.00        | 0.13        |
|             | 03 June 2022   | 164      | 1          | 0         | Prefrontal, tropical system approaching from the southwest                                                       | NaN         |
| Jun Bermuda | 05 June 2022   | 165      | 29         | 24        | Could only fly in the morning due to approaching tropical cyclone (TC), TC departs 06 June 2022.                 | 1.97        | 0.00        | 0.00        | 0.07        | 0.00        | 0.06        | 0.00        | 0.00        |
|             | 07 June 2022   | 167      | 1          | 0         | High behind departing TC                                                                                         | NaN         |
|             | 08 June 2022   | 168, 169 | 2          | 1         | High pressure behind TC, African dust known to be in domain                                                      | 4.37        | 0.26        | 1.48        | 0.17        | 0.91        | 0.16        | 0.91        | 1.97        |

|  |                |          |           |           |                                                                                           |             |             |             |             |             |             |             |             |
|--|----------------|----------|-----------|-----------|-------------------------------------------------------------------------------------------|-------------|-------------|-------------|-------------|-------------|-------------|-------------|-------------|
|  | 10 June 2022   | 170      | 1         | 1         | High pressure, isolated thunderstorms, African dust known to be in domain                 | 2.28        | 0.00        | 0.00        | 0.06        | 0.00        | 0.01        | 0.00        | 0.00        |
|  | 11 June 2022   | 172, 173 | 20        | 7         | High pressure, African dust known to be in domain                                         | 0.89        | 0.00        | 0.00        | 0.03        | 0.19        | 0.03        | 0.01        | 0.00        |
|  | 13 June 2022   | 174      | 25        | 17        | High pressure, African dust known to be in domain but sampled away from dust for contrast | 1.38        | 0.00        | 0.00        | 0.05        | 0.00        | 0.04        | 0.00        | 0.00        |
|  | <b>Overall</b> |          | <b>83</b> | <b>51</b> |                                                                                           | <b>1.42</b> | <b>0.00</b> | <b>0.00</b> | <b>0.05</b> | <b>0.01</b> | <b>0.04</b> | <b>0.00</b> | <b>0.00</b> |

152 <sup>1</sup>Davis et al. (1997)

153 **Table S12.** Same as Table S8, except fossil fuel combustion by motor vehicles is considered as  
 154 the only combustion process contributing to Na<sup>+</sup><sub>comb</sub> and K<sup>+</sup><sub>comb</sub>.

| Category         | Date             | RF(s)    | N PILS samples | N samples w/ derived species | Meteorological conditions and/or relevant notes               | Median ssNa <sup>+</sup> (µg m <sup>-3</sup> ) | Median Na <sup>+</sup> <sub>dust</sub> (µg m <sup>-3</sup> ) | Median Na <sup>+</sup> <sub>comb</sub> (µg m <sup>-3</sup> ) | Median ssCa <sup>2+</sup> (µg m <sup>-3</sup> ) | Median Ca <sup>2+</sup> <sub>dust</sub> (µg m <sup>-3</sup> ) | Median ssK <sup>+</sup> (µg m <sup>-3</sup> ) | Median K <sup>+</sup> <sub>dust</sub> (µg m <sup>-3</sup> ) | Median K <sup>+</sup> <sub>comb</sub> (µg m <sup>-3</sup> ) |
|------------------|------------------|----------|----------------|------------------------------|---------------------------------------------------------------|------------------------------------------------|--------------------------------------------------------------|--------------------------------------------------------------|-------------------------------------------------|---------------------------------------------------------------|-----------------------------------------------|-------------------------------------------------------------|-------------------------------------------------------------|
| Dec-Feb          | 30 November 2021 | 94       | 7              | 1                            | Remains of post-frontal conditions                            | 0.16                                           | 0.00                                                         | 0.00                                                         | 0.01                                            | 0.40                                                          | 0.01                                          | 0.06                                                        | 0.00                                                        |
|                  | 01 December 2021 | 95       | 16             | 14                           | Prefrontal, high pressure; smoke in boundary layer near coast | 0.35                                           | 0.00                                                         | 0.00                                                         | 0.01                                            | 0.47                                                          | 0.01                                          | 0.05                                                        | 0.00                                                        |
|                  | 07 December 2021 | 96       | 5              | 3                            | Postfrontal, cold high pressure behind a strong cold front    | 0.19                                           | 0.00                                                         | 0.00                                                         | 0.01                                            | 0.22                                                          | 0.01                                          | 0.02                                                        | 0.00                                                        |
|                  | 11 January 2022  | 100, 101 | 6              | 3                            | Cold high pressure, cold air outbreak (CAO) conditions        | 0.36                                           | 0.00                                                         | 0.00                                                         | 0.01                                            | 0.08                                                          | 0.01                                          | 0.01                                                        | 0.00                                                        |
|                  | 12 January 2022  | 102, 103 | 33             | 11                           | Cold high pressure                                            | 0.21                                           | 0.00                                                         | 0.00                                                         | 0.01                                            | 0.08                                                          | 0.00                                          | 0.02                                                        | 0.00                                                        |
|                  | 15 January 2022  | 104      | 3              | 2                            | Postfrontal                                                   | 0.69                                           | 0.00                                                         | 0.00                                                         | 0.01                                            | 0.04                                                          | 0.01                                          | 0.00                                                        | 0.00                                                        |
|                  | 18 January 2022  | 105      | 11             | 0                            | Low pressure moves offshore, sets up CAO conditions           | NaN                                            | NaN                                                          | NaN                                                          | NaN                                             | NaN                                                           | NaN                                           | NaN                                                         | NaN                                                         |
|                  | 19 January 2022  | 107, 108 | 26             | 6                            | Short-lived high pressure                                     | 0.21                                           | 0.01                                                         | 0.05                                                         | 0.01                                            | 0.07                                                          | 0.01                                          | 0.06                                                        | 0.06                                                        |
|                  | 24 January 2022  | 109, 110 | 26             | 9                            | Postfrontal, weak high pressure                               | 0.07                                           | 0.00                                                         | 0.02                                                         | 0.00                                            | 0.09                                                          | 0.00                                          | 0.05                                                        | 0.02                                                        |
|                  | 26 January 2022  | 111, 112 | 20             | 7                            | Postfrontal                                                   | 0.05                                           | 0.00                                                         | 0.32                                                         | 0.00                                            | 0.05                                                          | 0.00                                          | 0.05                                                        | 0.35                                                        |
|                  | 27 January 2022  | 113, 114 | 18             | 4                            | Cold high pressure                                            | 0.28                                           | 0.00                                                         | 0.00                                                         | 0.01                                            | 0.00                                                          | 0.01                                          | 0.00                                                        | 0.00                                                        |
|                  | 01 February 2022 | 115      | 8              | 4                            | High pressure                                                 | 1.10                                           | 0.00                                                         | 0.00                                                         | 0.02                                            | 0.03                                                          | 0.02                                          | 0.00                                                        | 0.00                                                        |
| 02 February 2022 | 116              | 17       | 4              | High pressure                | 0.74                                                          | 0.00                                           | 0.00                                                         | 0.02                                                         | 0.01                                            | 0.03                                                          | 0.00                                          | 0.02                                                        |                                                             |

|     |                  |          |            |            |                                                                                |             |             |             |             |             |             |             |             |
|-----|------------------|----------|------------|------------|--------------------------------------------------------------------------------|-------------|-------------|-------------|-------------|-------------|-------------|-------------|-------------|
|     | 03 February 2022 | 117, 118 | 15         | 4          | High pressure                                                                  | 1.16        | 0.00        | 0.00        | 0.03        | 0.00        | 0.04        | 0.00        | 0.01        |
|     | 15 February 2022 | 120, 121 | 34         | 7          | Postfrontal conditions, cold high pressure                                     | 0.31        | 0.00        | 0.00        | 0.01        | 0.13        | 0.01        | 0.01        | 0.00        |
|     | 16 February 2022 | 122, 123 | 21         | 10         | Cold high pressure                                                             | 0.22        | 0.00        | 0.00        | 0.01        | 0.12        | 0.01        | 0.03        | 0.00        |
|     | 19 February 2022 | 124, 125 | 38         | 18         | Weak postfrontal                                                               | 0.07        | 0.00        | 0.00        | 0.00        | 0.11        | 0.00        | 0.04        | 0.00        |
|     | 22 February 2022 | 126, 127 | 25         | 20         | Prefrontal, high pressure                                                      | 1.73        | 0.00        | 0.00        | 0.05        | 0.07        | 0.04        | 0.00        | 0.00        |
|     | 26 February 2022 | 128, 129 | 16         | 14         | Postfrontal                                                                    | 0.10        | 0.00        | 0.00        | 0.00        | 0.05        | 0.00        | 0.04        | 0.00        |
|     | <b>Overall</b>   |          | <b>345</b> | <b>141</b> |                                                                                | <b>0.24</b> | <b>0.00</b> | <b>0.00</b> | <b>0.01</b> | <b>0.08</b> | <b>0.01</b> | <b>0.02</b> | <b>0.00</b> |
|     | 02 March 2022    | 130      | 39         | 30         | Postfrontal, high pressure                                                     | 0.29        | 0.00        | 0.00        | 0.01        | 0.17        | 0.01        | 0.01        | 0.00        |
|     | 03 March 2022    | 131, 132 | 71         | 53         | Weak prefrontal                                                                | 0.86        | 0.00        | 0.00        | 0.03        | 0.26        | 0.03        | 0.03        | 0.00        |
|     | 04 March 2022    | 133, 134 | 42         | 29         | Cold high pressure                                                             | 1.51        | 0.00        | 0.00        | 0.05        | 0.05        | 0.05        | 0.01        | 0.00        |
|     | 13 March 2022    | 138      | 8          | 2          | Postfrontal, CAO conditions                                                    | 0.11        | 0.00        | 0.00        | 0.00        | 0.59        | 0.00        | 0.08        | 0.00        |
|     | 14 March 2022    | 139, 140 | 38         | 32         | Late postfrontal, cold high pressure; smoke plume sampled from a woodland fire | 0.08        | 0.00        | 0.01        | 0.00        | 0.06        | 0.00        | 0.04        | 0.01        |
| Mar | 18 March 2022    | 141      | 14         | 12         | Weak postfrontal                                                               | 0.08        | 0.01        | 0.06        | 0.00        | 0.04        | 0.00        | 0.04        | 0.07        |
|     | 26 March 2022    | 144, 145 | 29         | 15         | Postfrontal; sampled dust, smoke, and potentially pollen                       | 0.04        | 0.02        | 0.01        | 0.00        | 0.05        | 0.00        | 0.04        | 0.01        |
|     | 28 March 2022    | 146      | 17         | 10         | Postfrontal                                                                    | 0.05        | 0.00        | 0.00        | 0.00        | 0.05        | 0.00        | 0.04        | 0.00        |
|     | 29 March 2022    | 147, 148 | 19         | 4          | Postfrontal, high pressure, CAO conditions                                     | 0.13        | 0.02        | 0.02        | 0.00        | 0.15        | 0.00        | 0.05        | 0.02        |
|     | <b>Overall</b>   |          | <b>277</b> | <b>187</b> |                                                                                | <b>0.25</b> | <b>0.00</b> | <b>0.00</b> | <b>0.01</b> | <b>0.12</b> | <b>0.01</b> | <b>0.03</b> | <b>0.00</b> |
| May | 03 May 2022      | 149      | 15         | 10         | Weak prefrontal; presence of smoke potentially from New Mexico                 | 0.40        | 0.00        | 0.00        | 0.01        | 0.14        | 0.01        | 0.05        | 0.00        |

|             |                |          |            |           |                                                                                                                  |             |             |             |             |             |             |             |             |
|-------------|----------------|----------|------------|-----------|------------------------------------------------------------------------------------------------------------------|-------------|-------------|-------------|-------------|-------------|-------------|-------------|-------------|
|             | 05 May 2022    | 150, 151 | 18         | 9         | Postfrontal                                                                                                      | 0.02        | 0.00        | 0.00        | 0.00        | 0.05        | 0.00        | 0.03        | 0.00        |
|             | 16 May 2022    | 153, 154 | 39         | 5         | Prefrontal to an approaching cold front yet also postfrontal to a departing band of precipitation                | 0.29        | 0.00        | 0.00        | 0.01        | 0.31        | 0.01        | 0.02        | 0.00        |
|             | 17 May 2022    | 155      | 37         | 2         | Postfrontal                                                                                                      | 0.06        | 0.00        | 0.00        | 0.00        | 0.01        | 0.00        | 0.01        | 0.00        |
|             | 20 May 2022    | 158      | 28         | 19        | Warm high pressure, southerly flow due to Bermuda high <sup>2</sup> ; haze with potential sampling of bioaerosol | 2.24        | 0.00        | 0.00        | 0.08        | 0.06        | 0.06        | 0.00        | 0.00        |
|             | <b>Overall</b> |          | <b>137</b> | <b>45</b> |                                                                                                                  | <b>0.42</b> | <b>0.00</b> | <b>0.00</b> | <b>0.01</b> | <b>0.08</b> | <b>0.01</b> | <b>0.01</b> | <b>0.00</b> |
| Mar transit | 22 March 2022  | 142, 143 | 48         | 47        | High pressure, two days after a cold front and two days before another cold front                                | 0.72        | 0.00        | 0.00        | 0.03        | 0.10        | 0.02        | 0.05        | 0.00        |
|             | 18 May 2022    | 156, 157 | 67         | 23        | Postfrontal along East Coast, aircraft passed across the cold front on the way to Bermuda                        | 1.11        | 0.00        | 0.00        | 0.04        | 0.01        | 0.02        | 0.00        | 0.00        |
| May transit | 21 May 2022    | 159, 160 | 42         | 14        | Warm high pressure, anticyclonic flow around Bermuda high                                                        | 1.14        | 0.00        | 0.00        | 0.04        | 0.01        | 0.03        | 0.00        | 0.00        |
|             | 31 May 2022    | 161      | 11         | 1         | Postfrontal                                                                                                      | 0.01        | 0.01        | 0.18        | 0.00        | 0.02        | 0.00        | 0.02        | 0.20        |
|             | <b>Overall</b> |          | <b>120</b> | <b>38</b> |                                                                                                                  | <b>1.08</b> | <b>0.00</b> | <b>0.00</b> | <b>0.04</b> | <b>0.01</b> | <b>0.02</b> | <b>0.00</b> | <b>0.00</b> |
|             | 02 June 2022   | 162, 163 | 4          | 1         | Prefrontal                                                                                                       | 0.76        | 0.00        | 0.07        | 0.03        | 0.00        | 0.03        | 0.00        | 0.13        |
|             | 03 June 2022   | 164      | 1          | 0         | Prefrontal, tropical system approaching from the southwest                                                       | NaN         |
| Jun Bermuda | 05 June 2022   | 165      | 29         | 24        | Could only fly in the morning due to approaching tropical cyclone (TC), TC departs 06 June 2022.                 | 1.97        | 0.00        | 0.00        | 0.07        | 0.00        | 0.06        | 0.00        | 0.00        |
|             | 07 June 2022   | 167      | 1          | 0         | High behind departing TC                                                                                         | NaN         |
|             | 08 June 2022   | 168, 169 | 2          | 1         | High pressure behind TC, African dust known to be in domain                                                      | 4.09        | 0.23        | 1.79        | 0.16        | 0.92        | 0.15        | 0.92        | 1.97        |

|  |                |          |           |           |                                                                                           |             |             |             |             |             |             |             |             |
|--|----------------|----------|-----------|-----------|-------------------------------------------------------------------------------------------|-------------|-------------|-------------|-------------|-------------|-------------|-------------|-------------|
|  | 10 June 2022   | 170      | 1         | 1         | High pressure, isolated thunderstorms, African dust known to be in domain                 | 2.28        | 0.00        | 0.00        | 0.06        | 0.00        | 0.01        | 0.00        | 0.00        |
|  | 11 June 2022   | 172, 173 | 20        | 7         | High pressure, African dust known to be in domain                                         | 0.89        | 0.00        | 0.00        | 0.03        | 0.19        | 0.03        | 0.01        | 0.00        |
|  | 13 June 2022   | 174      | 25        | 17        | High pressure, African dust known to be in domain but sampled away from dust for contrast | 1.38        | 0.00        | 0.00        | 0.05        | 0.00        | 0.04        | 0.00        | 0.00        |
|  | <b>Overall</b> |          | <b>83</b> | <b>51</b> |                                                                                           | <b>1.42</b> | <b>0.00</b> | <b>0.00</b> | <b>0.05</b> | <b>0.01</b> | <b>0.04</b> | <b>0.00</b> | <b>0.00</b> |

155 <sup>1</sup>Davis et al. (1997)

156 **Table S13.** Same as Table S8, except burning of pulverized western coal comprised of low sulfur  
 157 (0.5%) and high ash (22%) at a coal-fired power plant is considered as the only combustion process  
 158 contributing to Na<sup>+</sup><sub>comb</sub> and K<sup>+</sup><sub>comb</sub>.

| Category | Date             | RF(s)    | N PILS samples | N samples w/ derived species | Meteorological conditions and/or relevant notes               | Median ssNa <sup>+</sup> (µg m <sup>-3</sup> ) | Median Na <sup>+</sup> <sub>dust</sub> (µg m <sup>-3</sup> ) | Median Na <sup>+</sup> <sub>comb</sub> (µg m <sup>-3</sup> ) | Median ssCa <sup>2+</sup> (µg m <sup>-3</sup> ) | Median Ca <sup>2+</sup> <sub>dust</sub> (µg m <sup>-3</sup> ) | Median ssK <sup>+</sup> (µg m <sup>-3</sup> ) | Median K <sup>+</sup> <sub>dust</sub> (µg m <sup>-3</sup> ) | Median K <sup>+</sup> <sub>comb</sub> (µg m <sup>-3</sup> ) |
|----------|------------------|----------|----------------|------------------------------|---------------------------------------------------------------|------------------------------------------------|--------------------------------------------------------------|--------------------------------------------------------------|-------------------------------------------------|---------------------------------------------------------------|-----------------------------------------------|-------------------------------------------------------------|-------------------------------------------------------------|
| Dec-Feb  | 30 November 2021 | 94       | 7              | 1                            | Remains of post-frontal conditions                            | 0.16                                           | 0.00                                                         | 0.00                                                         | 0.01                                            | 0.40                                                          | 0.01                                          | 0.06                                                        | 0.00                                                        |
|          | 01 December 2021 | 95       | 16             | 14                           | Prefrontal, high pressure; smoke in boundary layer near coast | 0.35                                           | 0.00                                                         | 0.00                                                         | 0.01                                            | 0.47                                                          | 0.01                                          | 0.05                                                        | 0.00                                                        |
|          | 07 December 2021 | 96       | 5              | 3                            | Postfrontal, cold high pressure behind a strong cold front    | 0.19                                           | 0.00                                                         | 0.00                                                         | 0.01                                            | 0.22                                                          | 0.01                                          | 0.02                                                        | 0.00                                                        |
|          | 11 January 2022  | 100, 101 | 6              | 3                            | Cold high pressure, cold air outbreak (CAO) conditions        | 0.36                                           | 0.00                                                         | 0.00                                                         | 0.01                                            | 0.08                                                          | 0.01                                          | 0.01                                                        | 0.00                                                        |
|          | 12 January 2022  | 102, 103 | 33             | 11                           | Cold high pressure                                            | 0.16                                           | 0.00                                                         | 0.00                                                         | 0.01                                            | 0.08                                                          | 0.00                                          | 0.03                                                        | 0.00                                                        |
|          | 15 January 2022  | 104      | 3              | 2                            | Postfrontal                                                   | 0.69                                           | 0.00                                                         | 0.00                                                         | 0.01                                            | 0.04                                                          | 0.01                                          | 0.00                                                        | 0.00                                                        |
|          | 18 January 2022  | 105      | 11             | 0                            | Low pressure moves offshore, sets up CAO conditions           | NaN                                            | NaN                                                          | NaN                                                          | NaN                                             | NaN                                                           | NaN                                           | NaN                                                         | NaN                                                         |
|          | 19 January 2022  | 107, 108 | 26             | 6                            | Short-lived high pressure                                     | 0.00                                           | 0.01                                                         | 0.19                                                         | 0.00                                            | 0.07                                                          | 0.00                                          | 0.06                                                        | 0.06                                                        |
|          | 24 January 2022  | 109, 110 | 26             | 9                            | Postfrontal, weak high pressure                               | 0.07                                           | 0.00                                                         | 0.06                                                         | 0.00                                            | 0.09                                                          | 0.00                                          | 0.05                                                        | 0.02                                                        |
|          | 26 January 2022  | 111, 112 | 20             | 7                            | Postfrontal                                                   | 0.00                                           | 0.00                                                         | 0.37                                                         | 0.00                                            | 0.05                                                          | 0.00                                          | 0.05                                                        | 0.35                                                        |
|          | 27 January 2022  | 113, 114 | 18             | 4                            | Cold high pressure                                            | 0.28                                           | 0.00                                                         | 0.00                                                         | 0.01                                            | 0.00                                                          | 0.01                                          | 0.00                                                        | 0.00                                                        |
|          | 01 February 2022 | 115      | 8              | 4                            | High pressure                                                 | 1.10                                           | 0.00                                                         | 0.00                                                         | 0.02                                            | 0.03                                                          | 0.02                                          | 0.00                                                        | 0.00                                                        |
|          | 02 February 2022 | 116      | 17             | 4                            | High pressure                                                 | 0.72                                           | 0.00                                                         | 0.00                                                         | 0.02                                            | 0.01                                                          | 0.02                                          | 0.00                                                        | 0.02                                                        |



|     |                        |             |            |            |                                                                                            |             |             |             |             |             |             |             |             |
|-----|------------------------|-------------|------------|------------|--------------------------------------------------------------------------------------------|-------------|-------------|-------------|-------------|-------------|-------------|-------------|-------------|
|     | 03<br>February<br>2022 | 117,<br>118 | 15         | 4          | High pressure                                                                              | 1.16        | 0.00        | 0.00        | 0.03        | 0.00        | 0.04        | 0.00        | 0.01        |
|     | 15<br>February<br>2022 | 120,<br>121 | 34         | 7          | Postfrontal<br>conditions, cold<br>high pressure                                           | 0.31        | 0.00        | 0.00        | 0.01        | 0.13        | 0.01        | 0.01        | 0.00        |
|     | 16<br>February<br>2022 | 122,<br>123 | 21         | 10         | Cold high pressure                                                                         | 0.16        | 0.00        | 0.00        | 0.01        | 0.12        | 0.00        | 0.03        | 0.00        |
|     | 19<br>February<br>2022 | 124,<br>125 | 38         | 18         | Weak postfrontal                                                                           | 0.04        | 0.00        | 0.00        | 0.00        | 0.11        | 0.00        | 0.04        | 0.00        |
|     | 22<br>February<br>2022 | 126,<br>127 | 25         | 20         | Prefrontal, high<br>pressure                                                               | 1.73        | 0.00        | 0.00        | 0.05        | 0.07        | 0.04        | 0.00        | 0.00        |
|     | 26<br>February<br>2022 | 128,<br>129 | 16         | 14         | Postfrontal                                                                                | 0.08        | 0.00        | 0.00        | 0.00        | 0.05        | 0.00        | 0.04        | 0.00        |
|     | <b>Overall</b>         |             | <b>345</b> | <b>141</b> |                                                                                            | <b>0.20</b> | <b>0.00</b> | <b>0.00</b> | <b>0.01</b> | <b>0.08</b> | <b>0.01</b> | <b>0.03</b> | <b>0.00</b> |
|     | 02 March<br>2022       | 130         | 39         | 30         | Postfrontal, high<br>pressure                                                              | 0.22        | 0.00        | 0.00        | 0.01        | 0.17        | 0.00        | 0.01        | 0.00        |
|     | 03 March<br>2022       | 131,<br>132 | 71         | 53         | Weak prefrontal                                                                            | 0.83        | 0.00        | 0.00        | 0.03        | 0.26        | 0.03        | 0.03        | 0.00        |
|     | 04 March<br>2022       | 133,<br>134 | 42         | 29         | Cold high pressure                                                                         | 1.51        | 0.00        | 0.00        | 0.06        | 0.05        | 0.05        | 0.01        | 0.00        |
|     | 13 March<br>2022       | 138         | 8          | 2          | Postfrontal, CAO<br>conditions                                                             | 0.11        | 0.00        | 0.00        | 0.00        | 0.59        | 0.00        | 0.08        | 0.00        |
|     | 14 March<br>2022       | 139,<br>140 | 38         | 32         | Late postfrontal,<br>cold high pressure;<br>smoke plume<br>sampled from a<br>woodland fire | 0.06        | 0.00        | 0.01        | 0.00        | 0.06        | 0.00        | 0.04        | 0.01        |
| Mar | 18 March<br>2022       | 141         | 14         | 12         | Weak postfrontal                                                                           | 0.00        | 0.00        | 0.12        | 0.00        | 0.04        | 0.00        | 0.04        | 0.07        |
|     | 26 March<br>2022       | 144,<br>145 | 29         | 15         | Postfrontal;<br>sampled dust,<br>smoke, and<br>potentially pollen                          | 0.02        | 0.00        | 0.01        | 0.00        | 0.05        | 0.00        | 0.04        | 0.01        |
|     | 28 March<br>2022       | 146         | 17         | 10         | Postfrontal                                                                                | 0.07        | 0.00        | 0.00        | 0.00        | 0.06        | 0.00        | 0.04        | 0.00        |
|     | 29 March<br>2022       | 147,<br>148 | 19         | 4          | Postfrontal, high<br>pressure, CAO<br>conditions                                           | 0.13        | 0.00        | 0.04        | 0.00        | 0.15        | 0.00        | 0.05        | 0.02        |
|     | <b>Overall</b>         |             | <b>277</b> | <b>187</b> |                                                                                            | <b>0.18</b> | <b>0.00</b> | <b>0.00</b> | <b>0.01</b> | <b>0.12</b> | <b>0.01</b> | <b>0.03</b> | <b>0.00</b> |
| May | 03 May<br>2022         | 149         | 15         | 10         | Weak prefrontal;<br>presence of smoke<br>potentially from<br>New Mexico                    | 0.39        | 0.00        | 0.00        | 0.01        | 0.14        | 0.01        | 0.05        | 0.00        |

|             |                |          |            |           |                                                                                                                  |             |             |             |             |             |             |             |             |
|-------------|----------------|----------|------------|-----------|------------------------------------------------------------------------------------------------------------------|-------------|-------------|-------------|-------------|-------------|-------------|-------------|-------------|
|             | 05 May 2022    | 150, 151 | 18         | 9         | Postfrontal                                                                                                      | 0.02        | 0.00        | 0.00        | 0.00        | 0.05        | 0.00        | 0.03        | 0.00        |
|             | 16 May 2022    | 153, 154 | 39         | 5         | Prefrontal to an approaching cold front yet also postfrontal to a departing band of precipitation                | 0.29        | 0.00        | 0.00        | 0.01        | 0.31        | 0.01        | 0.02        | 0.00        |
|             | 17 May 2022    | 155      | 37         | 2         | Postfrontal                                                                                                      | 0.06        | 0.00        | 0.00        | 0.00        | 0.01        | 0.00        | 0.01        | 0.00        |
|             | 20 May 2022    | 158      | 28         | 19        | Warm high pressure, southerly flow due to Bermuda high <sup>2</sup> ; haze with potential sampling of bioaerosol | 2.24        | 0.00        | 0.00        | 0.08        | 0.06        | 0.06        | 0.00        | 0.00        |
|             | <b>Overall</b> |          | <b>137</b> | <b>45</b> |                                                                                                                  | <b>0.42</b> | <b>0.00</b> | <b>0.00</b> | <b>0.01</b> | <b>0.08</b> | <b>0.01</b> | <b>0.01</b> | <b>0.00</b> |
| Mar transit | 22 March 2022  | 142, 143 | 48         | 47        | High pressure, two days after a cold front and two days before another cold front                                | 0.45        | 0.00        | 0.00        | 0.02        | 0.10        | 0.01        | 0.05        | 0.00        |
|             | 18 May 2022    | 156, 157 | 67         | 23        | Postfrontal along East Coast, aircraft passed across the cold front on the way to Bermuda                        | 1.11        | 0.00        | 0.00        | 0.04        | 0.01        | 0.02        | 0.00        | 0.00        |
| May transit | 21 May 2022    | 159, 160 | 42         | 14        | Warm high pressure, anticyclonic flow around Bermuda high                                                        | 1.14        | 0.00        | 0.00        | 0.04        | 0.01        | 0.03        | 0.00        | 0.00        |
|             | 31 May 2022    | 161      | 11         | 1         | Postfrontal                                                                                                      | 0.00        | 0.00        | 0.20        | 0.00        | 0.02        | 0.00        | 0.02        | 0.20        |
|             | <b>Overall</b> |          | <b>120</b> | <b>38</b> |                                                                                                                  | <b>1.08</b> | <b>0.00</b> | <b>0.00</b> | <b>0.04</b> | <b>0.01</b> | <b>0.02</b> | <b>0.00</b> | <b>0.00</b> |
|             | 02 June 2022   | 162, 163 | 4          | 1         | Prefrontal                                                                                                       | 0.56        | 0.00        | 0.27        | 0.02        | 0.01        | 0.02        | 0.01        | 0.13        |
|             | 03 June 2022   | 164      | 1          | 0         | Prefrontal, tropical system approaching from the southwest                                                       | NaN         |
| Jun Bermuda | 05 June 2022   | 165      | 29         | 24        | Could only fly in the morning due to approaching tropical cyclone (TC), TC departs 06 June 2022.                 | 1.94        | 0.00        | 0.00        | 0.07        | 0.00        | 0.06        | 0.00        | 0.00        |
|             | 07 June 2022   | 167      | 1          | 0         | High behind departing TC                                                                                         | NaN         |
|             | 08 June 2022   | 168, 169 | 2          | 1         | High pressure behind TC, African dust known to be in domain                                                      | 0.00        | 0.18        | 5.94        | 0.00        | 1.07        | 0.00        | 1.08        | 1.96        |

|  |                |          |           |           |                                                                                           |             |             |             |             |             |             |             |             |
|--|----------------|----------|-----------|-----------|-------------------------------------------------------------------------------------------|-------------|-------------|-------------|-------------|-------------|-------------|-------------|-------------|
|  | 10 June 2022   | 170      | 1         | 1         | High pressure, isolated thunderstorms, African dust known to be in domain                 | 2.28        | 0.00        | 0.00        | 0.06        | 0.00        | 0.01        | 0.00        | 0.00        |
|  | 11 June 2022   | 172, 173 | 20        | 7         | High pressure, African dust known to be in domain                                         | 0.89        | 0.00        | 0.00        | 0.03        | 0.19        | 0.03        | 0.01        | 0.00        |
|  | 13 June 2022   | 174      | 25        | 17        | High pressure, African dust known to be in domain but sampled away from dust for contrast | 1.38        | 0.00        | 0.00        | 0.05        | 0.00        | 0.04        | 0.00        | 0.00        |
|  | <b>Overall</b> |          | <b>83</b> | <b>51</b> |                                                                                           | <b>1.34</b> | <b>0.00</b> | <b>0.00</b> | <b>0.05</b> | <b>0.01</b> | <b>0.04</b> | <b>0.00</b> | <b>0.00</b> |

159 <sup>1</sup>Davis et al. (1997)

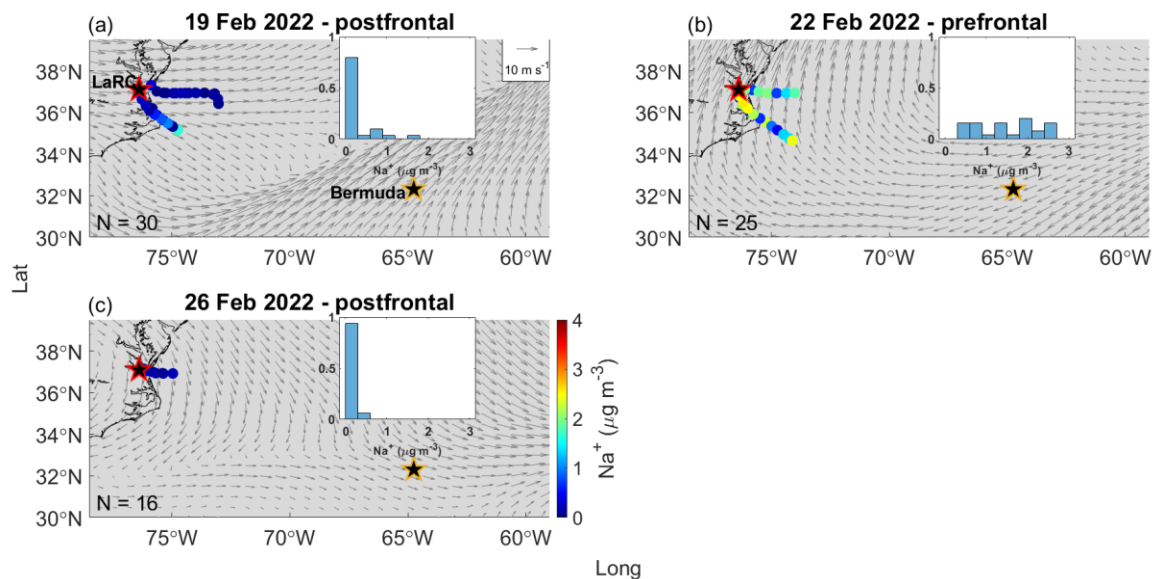

160

161 **Figure S1.** Bulk PILS  $\text{Na}^+$  mass concentrations from clear ensembles during flights experiencing  
 162 (a) postfrontal conditions on 19 February 2022 (RFs 124 and 125) (b) prefrontal conditions on  
 163 22 February 2022 (RFs 126 and 127), and (c) postfrontal conditions on 26 February 2022 (RFs  
 164 128 and 129). NASA Langley Research Center (LaRC) and Bermuda are marked with red-edged  
 165 and gold-edged stars, respectively. Normalized histograms in each panel show the distribution of  
 166 bulk PILS  $\text{Na}^+$  mass concentrations for the date indicated since overlap among the colored dots  
 167 can hide some from view. Grey arrows in each panel indicate the average magnitude and  
 168 direction of winds at 950 hPa from MERRA-2 at 3-hour time resolution during periods relevant  
 169 to each RF.

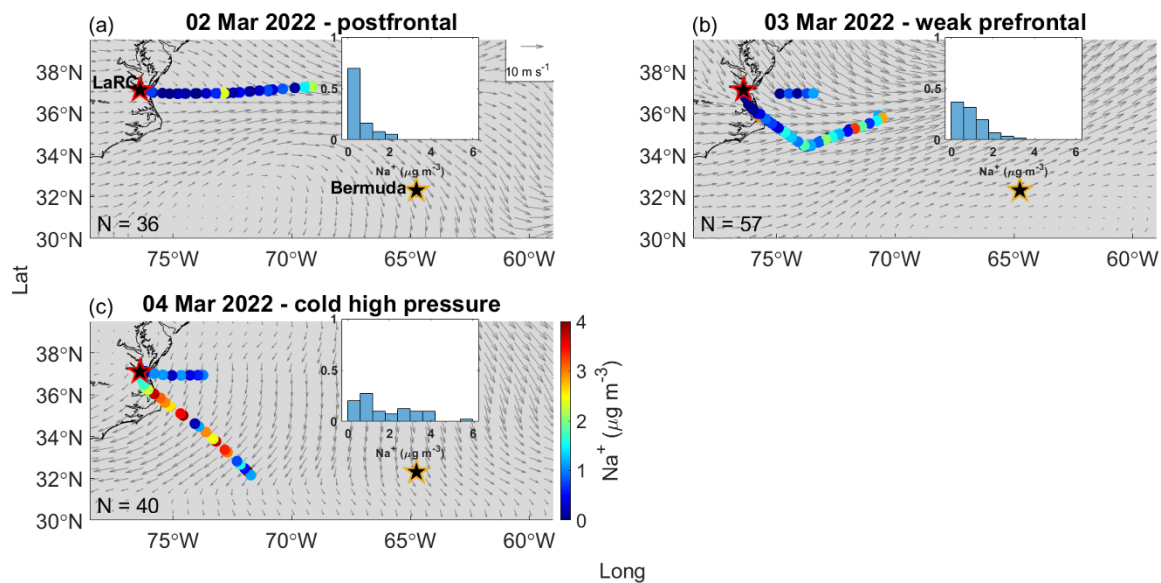

170

171 **Figure S2.** Same as Fig. S1 except for (a) postfrontal conditions on 02 March 2022 (RF 130), (b)  
 172 weak prefrontal conditions on 03 March 2022 (RFs 131 and 132), and (c) cold high pressure on  
 173 04 March 2022 (RFs 133 and 134).

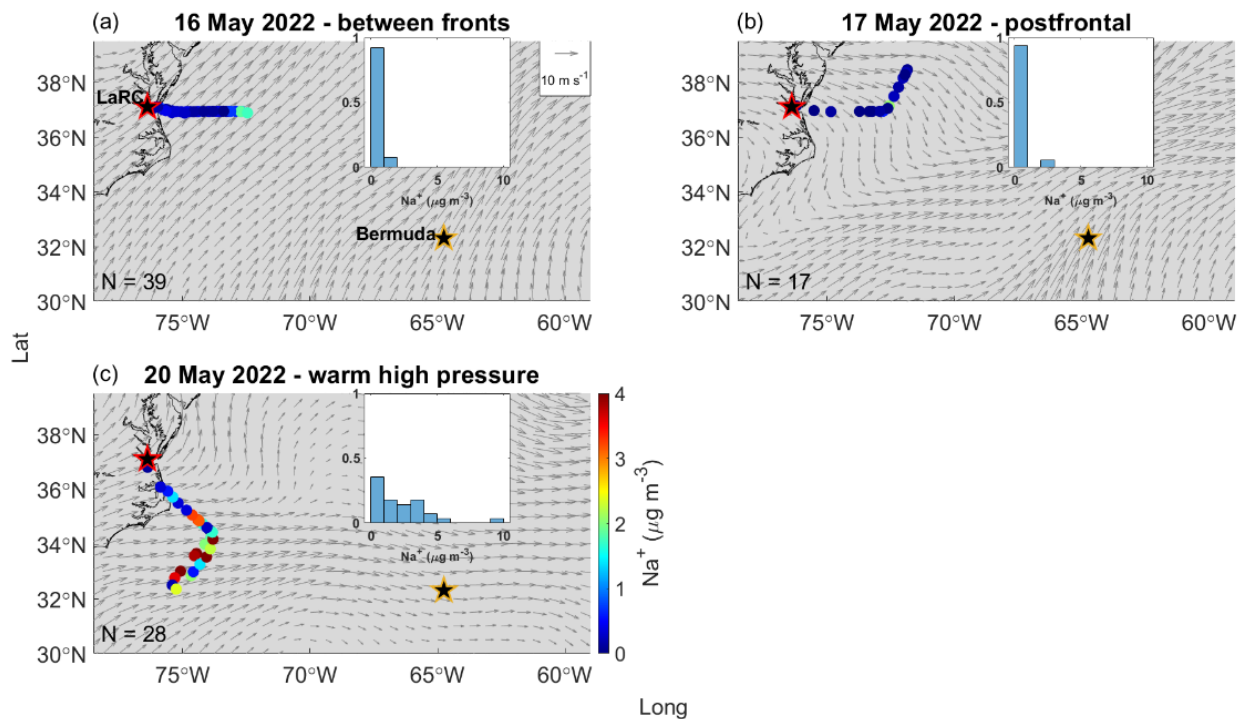

174

175 **Figure S3.** Same as Fig. S1 except for (a) conditions between fronts on 16 May 2022 (RFs 153  
 176 and 154), (b) postfrontal conditions on 17 May 2022 (RF 155), and (c) warm high pressure on 20  
 177 May 2022 (RF 158).

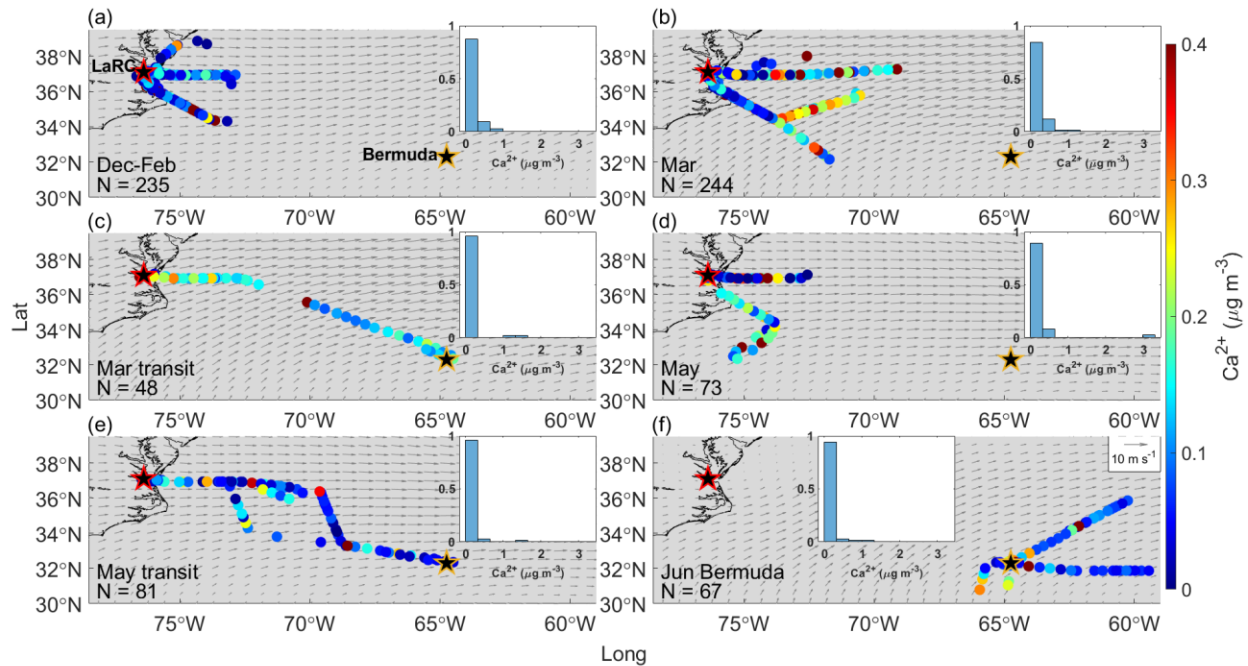

178

179 **Figure S4.** Bulk PILS  $\text{Ca}^{2+}$  mass concentrations from clear ensembles during (a) December  
 180 2021-February 2022, (b) March 2022, (c) March 2022 transit flights between LaRC (marked  
 181 with a red-edged star) and Bermuda (marked with a golden-edged star), (d) May 2022, (e) May  
 182 2022 transit flights between LaRC and Bermuda, and (f) the Bermuda field campaign in June  
 183 2022. Normalized histograms in each panel show the distribution of bulk PILS  $\text{Ca}^{2+}$  mass  
 184 concentrations for that specific category since overlap among the colored dots can hide some  
 185 from view. Grey arrows indicate the average magnitude and direction of MERRA-2 winds at 950  
 186 hPa for the month(s) relevant to each category.

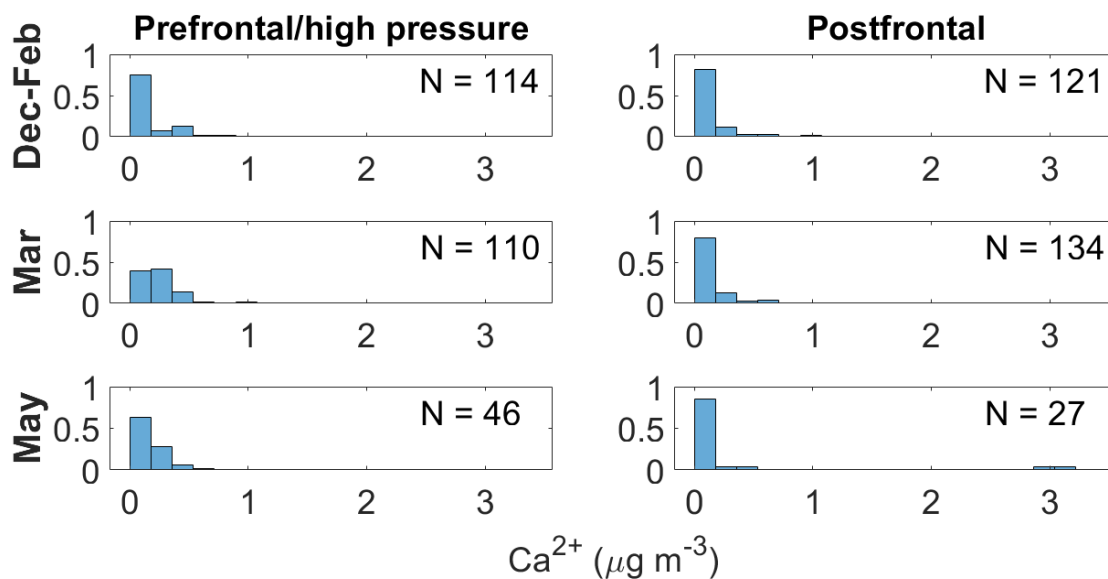

187

188 **Figure S5.** Normalized histograms showing differences in bulk PILS  $\text{Ca}^{2+}$  mass concentration  
 189 from clear ensembles occurring in prefrontal and/or high-pressure versus postfrontal conditions  
 190 for December-February (top row), March (middle row), and May (bottom row). These categories  
 191 are shown as they represent flights occurring in and around the East Coast, eliminating coastal  
 192 versus open-ocean sampling as a confounding variable.



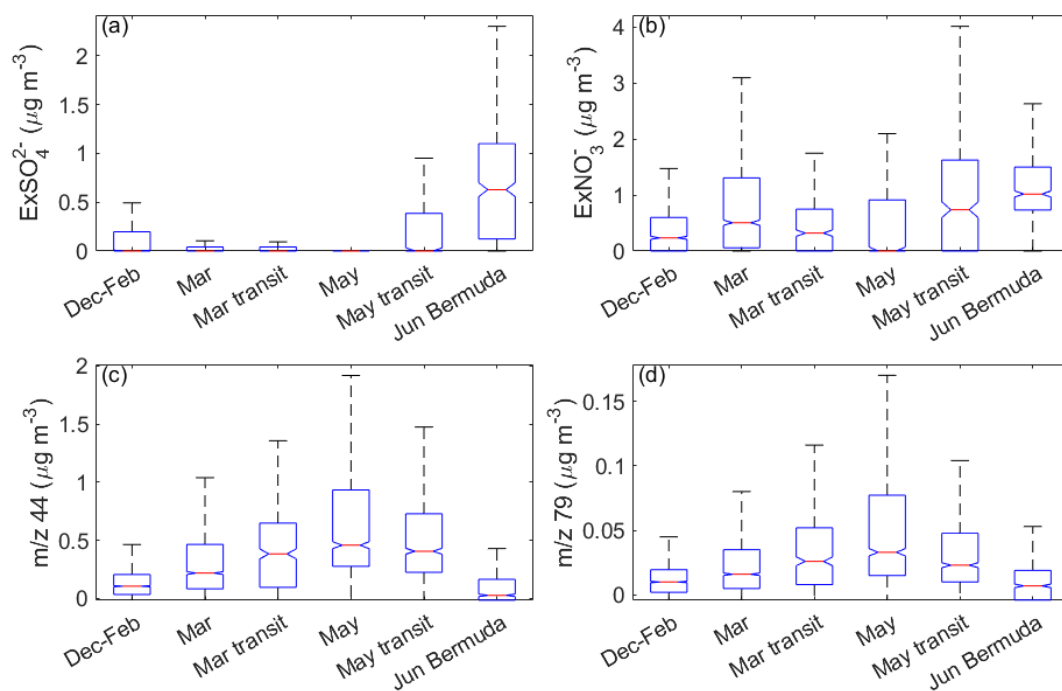

193

194 **Figure S6.** Notched box plots showing seasonal/categorical differences in mass concentrations  
 195 from clear ensembles of **(a)** excess  $\text{SO}_4^{2-}$  ( $\text{ExSO}_4^{2-}$ ), **(b)** excess  $\text{NO}_3^-$  ( $\text{ExNO}_3^-$ ), and spectral  
 196 markers for **(c)** oxygenated organics,  $m/z$  44, and **(d)** methanesulfonic acid (MSA),  $m/z$  79.

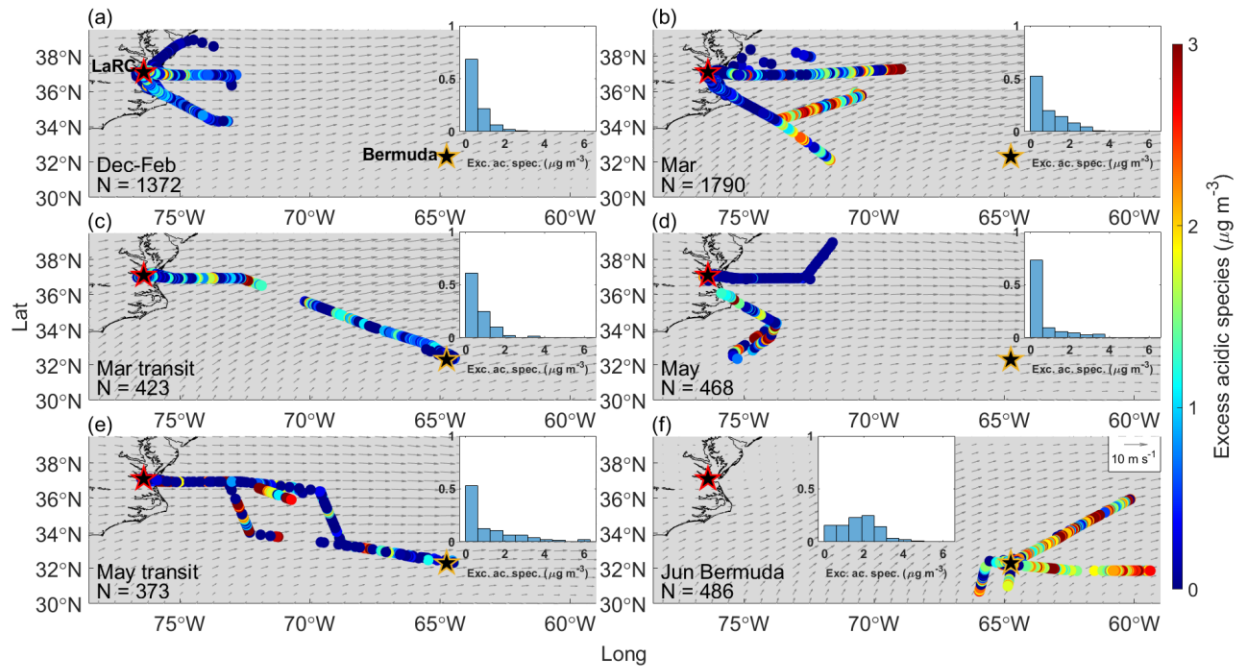

197

198 **Figure S7.** Same as Fig. S4, except for derived mass concentrations of excess acidic species.

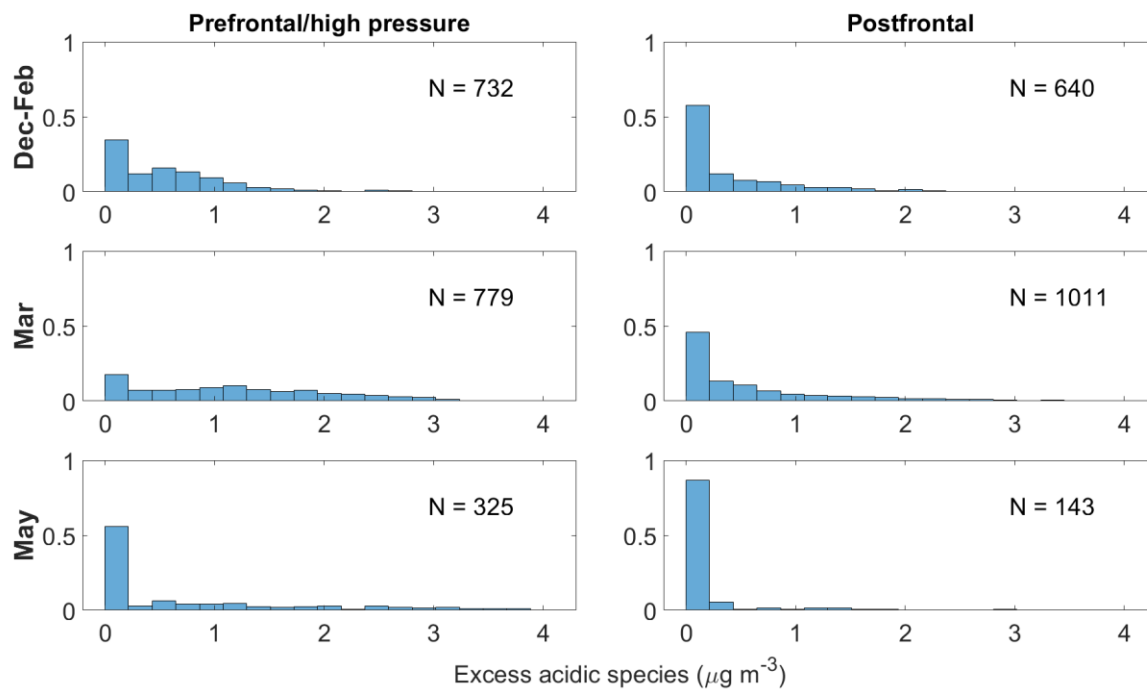

199

200 **Figure S8.** Same as Fig. S5, except for mass concentrations of excess acidic species.

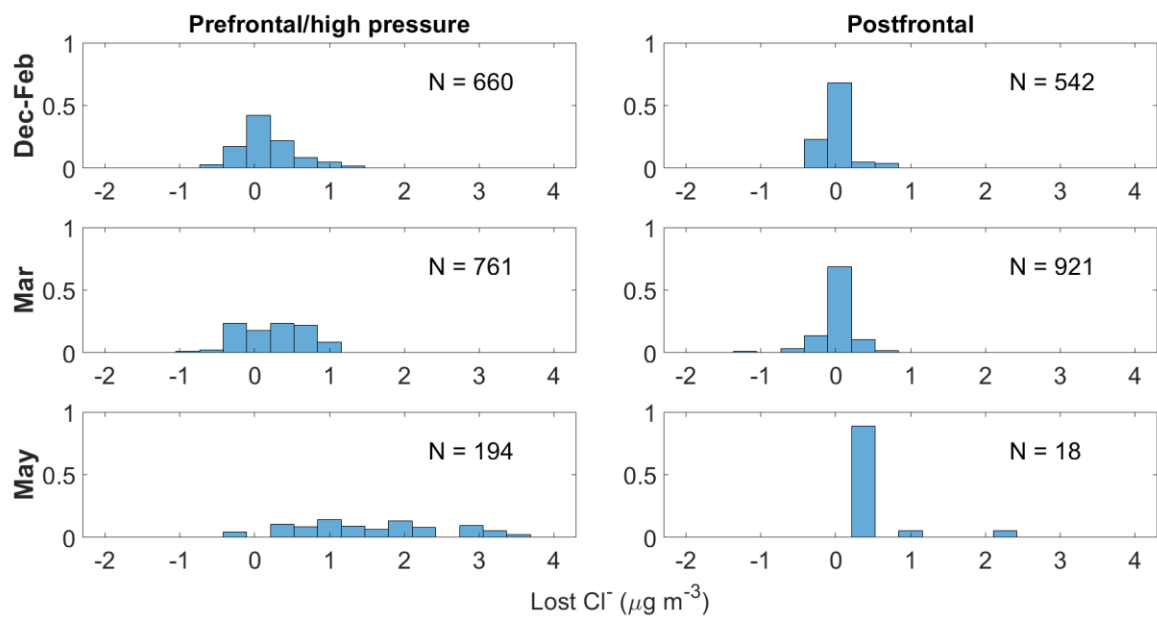

201

202 **Figure S9.** Same as Fig. S5, except for lost Cl<sup>-</sup> mass concentration.

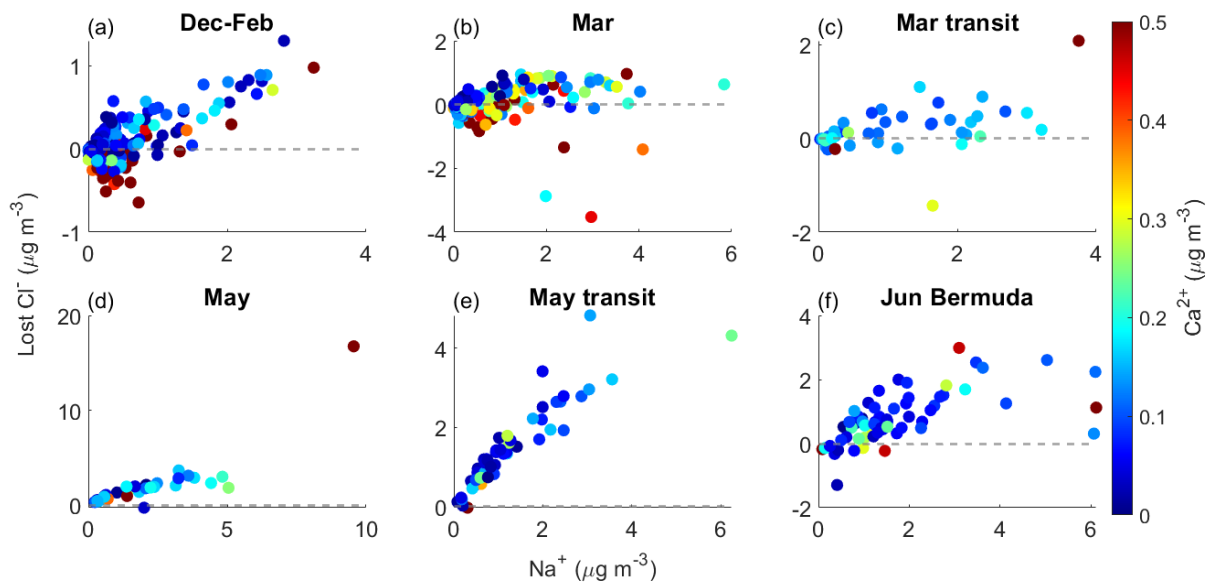

203

204 **Figure S10.** Relationships between mass concentration of bulk PILS  $\text{Na}^+$  and lost  $\text{Cl}^-$  colored by  
 205 bulk PILS  $\text{Ca}^{2+}$  mass concentration for the (a) December-February, (b) March, (c) March transit,  
 206 (d) May, (e) May transit, and (f) June Bermuda categories.

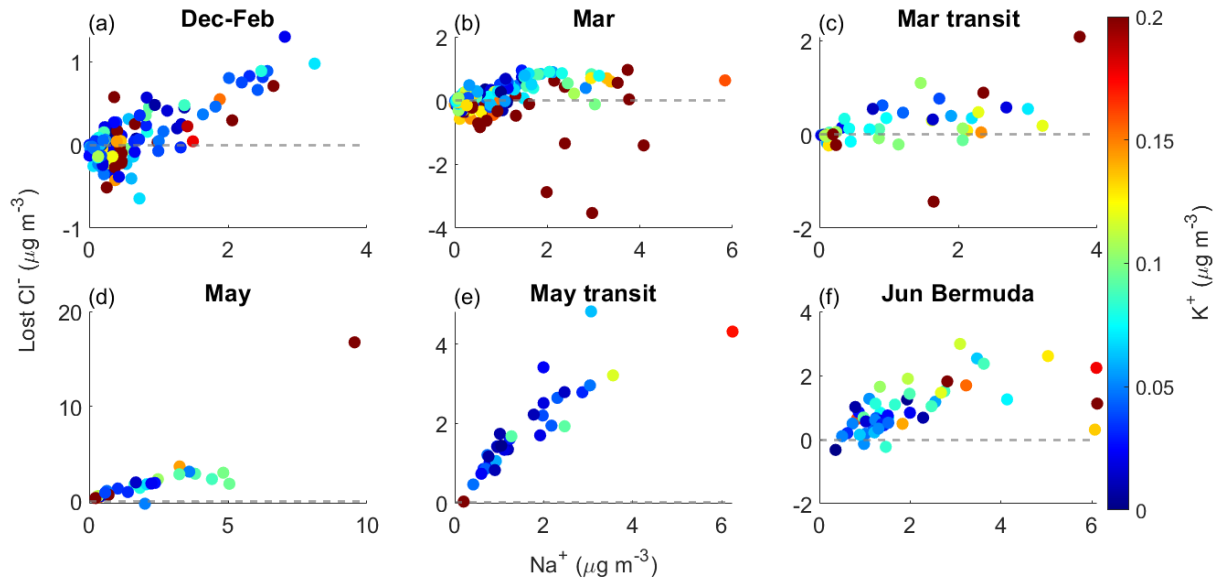

207

208 **Figure S11.** Same as Fig. S10, except colored by bulk PILS  $\text{K}^+$  mass concentration.

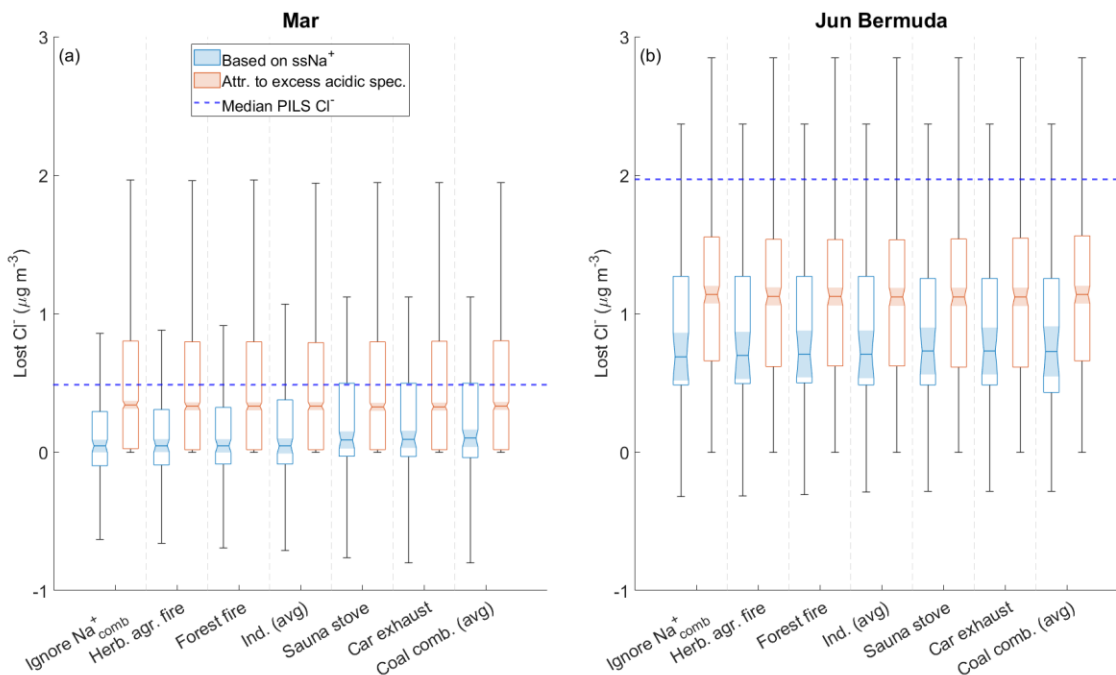

209

210 **Figure S12.** Notched box plots showing the sensitivity in actual and theoretical lost  $\text{Cl}^-$  to  
 211 accounting for  $\text{Na}^+$  from dust and various combustion processes during flights in (a) March near  
 212 the East Coast and (b) during the June field campaign in Bermuda. Light blue boxes represent  
 213 the actual  $\text{Cl}^-$  displaced from sea salt particles based on derived mass concentrations of  $\text{ssNa}^+$ ,  
 214 while light red boxes represent the theoretical  $\text{Cl}^-$  that could have been displaced by the derived  
 215 mass concentrations of excess acidic species. Combustion processes were assumed to not  
 216 contribute to bulk PILS  $\text{Na}^+$  mass concentrations for the “Ignore  $\text{Na}^+$  comb” results represented by  
 217 the pair of boxes farthest to the left in each panel. The remaining pairs of boxes are for the  
 218  $\text{Na}^+:\text{K}^+$  ratios described in Table S3 used to derive actual and theoretical lost  $\text{Cl}^-$ . Note that  
 219 “Herb. agr. fire” above stands for “Herbaceous agricultural fire.” The solid red line in the center  
 220 of each box indicates the median, box edges represent the 25<sup>th</sup> and 75<sup>th</sup> percentiles, and the lower  
 221 and upper whiskers indicate the lower limit (first quartile  $- 1.5 \times$  interquartile range) and upper  
 222 limit (third quartile  $+ 1.5 \times$  interquartile range), respectively. The notches span the 95<sup>th</sup>  
 223 confidence interval for the median. The horizontal dashed blue lines indicate the median bulk  
 224 PILS  $\text{Cl}^-$  mass concentration for each category.

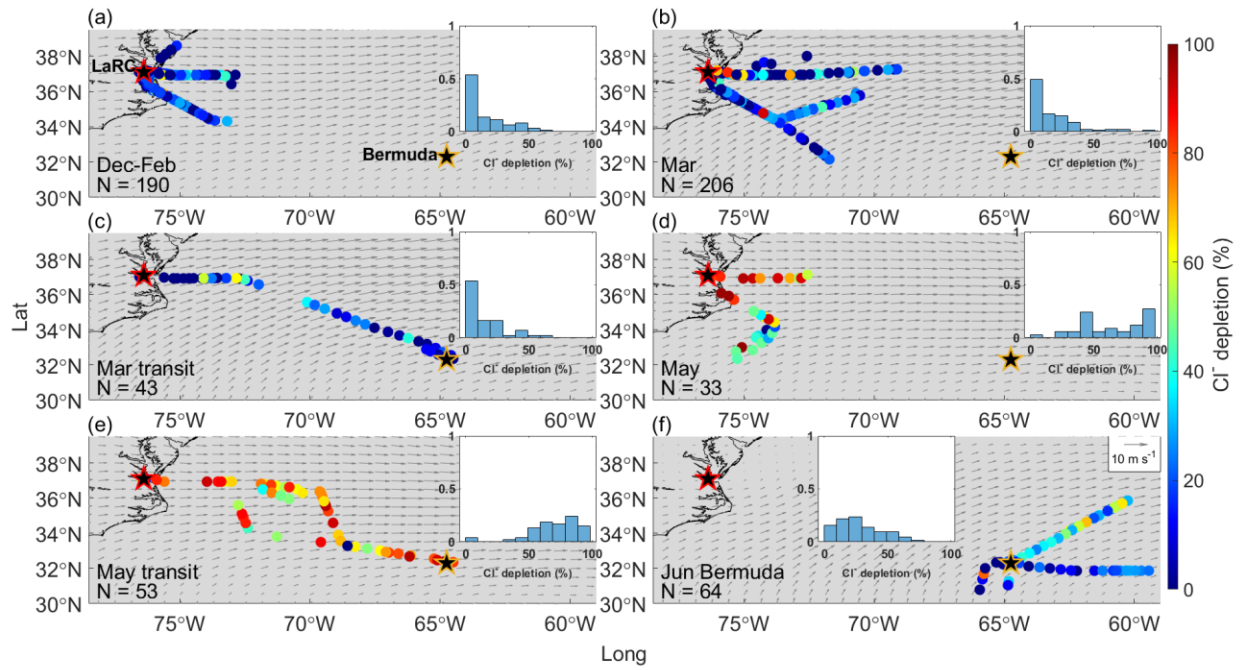

225

226 **Figure S13.** Same as Fig. S4, except for % $\text{Cl}^-$  depletion.



227 **References**

- 228 Aldhaif, A. M., Lopez, D. H., Dadashazar, H., and Sorooshian, A.: Sources, frequency, and  
229 chemical nature of dust events impacting the United States East Coast, *Atmospheric*  
230 *Environment*, 231, 117456, <https://doi.org/10.1016/j.atmosenv.2020.117456>, 2020.
- 231 AzadiAghdam, M., Braun, R. A., Edwards, E.-L., Bañaga, P. A., Cruz, M. T., Betito, G.,  
232 Cambaliza, M. O., Dadashazar, H., Lorenzo, G. R., Ma, L., MacDonald, A. B., Nguyen, P.,  
233 Simpas, J. B., Stahl, C., and Sorooshian, A.: On the nature of sea salt aerosol at a coastal  
234 megacity: Insights from Manila, Philippines in Southeast Asia, *Atmospheric Environment*, 216,  
235 116922, <https://doi.org/10.1016/j.atmosenv.2019.116922>, 2019.
- 236 Becagli, S., Proposito, M., Benassai, S., Gragnani, R., Magand, O., Traversi, R., and Udisti, R.:  
237 Spatial distribution of biogenic sulphur compounds (MSA, nssSO<sub>4</sub><sup>2-</sup>) in the northern Victoria  
238 Land–Dome C–Wilkes Land area, East Antarctica, *Annals of Glaciology*, 41, 23–31,  
239 <https://doi.org/10.3189/172756405781813384>, 2005.
- 240 Bondy, A. L., Wang, B., Laskin, A., Craig, R. L., Nhliziyo, M. V., Bertman, S. B., Pratt, K. A.,  
241 Shepson, P. B., and Ault, A. P.: Inland Sea Spray Aerosol Transport and Incomplete Chloride  
242 Depletion: Varying Degrees of Reactive Processing Observed during SOAS, *Environ. Sci.*  
243 *Technol.*, 51, 9533–9542, <https://doi.org/10.1021/acs.est.7b02085>, 2017.
- 244 Boreddy, S. K. R. and Kawamura, K.: A 12-year observation of water-soluble ions in TSP  
245 aerosols collected at a remote marine location in the western North Pacific: an outflow region of  
246 Asian dust, *Atmospheric Chemistry and Physics*, 15, 6437–6453, [https://doi.org/10.5194/acp-15-](https://doi.org/10.5194/acp-15-6437-2015)  
247 [6437-2015](https://doi.org/10.5194/acp-15-6437-2015), 2015.
- 248 Bowen, H. J. M.: *Environmental chemistry of the elements*, Academic Press, London, New  
249 York, xv, 333 pp., 1979.
- 250 Corral, A. F., Braun, R. A., Cairns, B., Gorooh, V. A., Liu, H., Ma, L., Mardi, A. H., Painemal,  
251 D., Stamnes, S., van Dierenhoven, B., Wang, H., Yang, Y., Zhang, B., and Sorooshian, A.: An  
252 Overview of Atmospheric Features Over the Western North Atlantic Ocean and North American  
253 East Coast – Part 1: Analysis of Aerosols, Gases, and Wet Deposition Chemistry, *Journal of*  
254 *Geophysical Research: Atmospheres*, 126, e2020JD032592,  
255 <https://doi.org/10.1029/2020JD032592>, 2021.
- 256 Davis, R. E., Hayden, B. P., Gay, D. A., Phillips, W. L., and Jones, G. V.: The North Atlantic  
257 Subtropical Anticyclone, *Journal of Climate*, 10, 728–744, [https://doi.org/10.1175/1520-](https://doi.org/10.1175/1520-0442(1997)010<0728:TNASA>2.0.CO;2)  
258 [0442\(1997\)010<0728:TNASA>2.0.CO;2](https://doi.org/10.1175/1520-0442(1997)010<0728:TNASA>2.0.CO;2), 1997.
- 259 Farren, N. J., Dunmore, R. E., Mead, M. I., Mohd Nadzir, M. S., Samah, A. A., Phang, S.-M.,  
260 Bandy, B. J., Sturges, W. T., and Hamilton, J. F.: Chemical characterisation of water-soluble  
261 ions in atmospheric particulate matter on the east coast of Peninsular Malaysia, *Atmospheric*  
262 *Chemistry and Physics*, 19, 1537–1553, <https://doi.org/10.5194/acp-19-1537-2019>, 2019.

263 Feng, L., Shen, H., Zhu, Y., Gao, H., and Yao, X.: Insight into Generation and Evolution of Sea-  
264 Salt Aerosols from Field Measurements in Diversified Marine and Coastal Atmospheres,  
265 Scientific Reports, 7, 41260, <https://doi.org/10.1038/srep41260>, 2017.

266 Finlayson-Pitts, B. J. and Pitts, J. N.: CHAPTER 9 - Particles in the Troposphere, in: Chemistry  
267 of the Upper and Lower Atmosphere, edited by: Finlayson-Pitts, B. J. and Pitts, J. N., Academic  
268 Press, San Diego, 349–435, <https://doi.org/10.1016/B978-012257060-5/50011-3>, 2000.

269 Haskins, J. D., Jaeglé, L., Shah, V., Lee, B. H., Lopez-Hilfiker, F. D., Campuzano-Jost, P.,  
270 Schroder, J. C., Day, D. A., Guo, H., Sullivan, A. P., Weber, R., Dibb, J., Campos, T., Jimenez,  
271 J. L., Brown, S. S., and Thornton, J. A.: Wintertime Gas-Particle Partitioning and Speciation of  
272 Inorganic Chlorine in the Lower Troposphere Over the Northeast United States and Coastal  
273 Ocean, Journal of Geophysical Research: Atmospheres, 123, 12,897–12,916,  
274 <https://doi.org/10.1029/2018JD028786>, 2018.

275 Heintzenberg, J., Covert, D. C., and Dingenen, R. V.: Size distribution and chemical composition  
276 of marine aerosols: a compilation and review, Tellus B: Chemical and Physical Meteorology, 52,  
277 1104–1122, <https://doi.org/10.3402/tellusb.v52i4.17090>, 2000.

278 Holland, H. D.: The chemistry of the atmosphere and oceans, New York : Wiley, 378 pp., 1978.

279 Huang, X., Olmez, I., Aras, N. K., and Gordon, G. E.: Emissions of trace elements from motor  
280 vehicles: Potential marker elements and source composition profile, Atmospheric Environment,  
281 28, 1385–1391, [https://doi.org/10.1016/1352-2310\(94\)90201-1](https://doi.org/10.1016/1352-2310(94)90201-1), 1994.

282 Jiang, B., Xie, Z., Lam, P. K. S., He, P., Yue, F., Wang, L., Huang, Y., Kang, H., Yu, X., and  
283 Wu, X.: Spatial and Temporal Distribution of Sea Salt Aerosol Mass Concentrations in the  
284 Marine Boundary Layer From the Arctic to the Antarctic, Journal of Geophysical Research:  
285 Atmospheres, 126, e2020JD033892, <https://doi.org/10.1029/2020JD033892>, 2021.

286 Junge, C. E. and Werby, R. T.: THE CONCENTRATION OF CHLORIDE, SODIUM,  
287 POTASSIUM, CALCIUM, AND SULFATE IN RAIN WATER OVER THE UNITED  
288 STATES, Journal of the Atmospheric Sciences, 15, 417–425, [https://doi.org/10.1175/1520-0469\(1958\)015<0417:TCOCSP>2.0.CO;2](https://doi.org/10.1175/1520-0469(1958)015<0417:TCOCSP>2.0.CO;2), 1958.

290 Keene, W. C. and Savoie, D. L.: The pH of deliquesced sea-salt aerosol in polluted marine air,  
291 Geophysical Research Letters, 25, 2181–2184, <https://doi.org/10.1029/98GL01591>, 1998.

292 Keene, W. C., Pszenny, A. A. P., Galloway, J. N., and Hawley, M. E.: Sea-salt corrections and  
293 interpretation of constituent ratios in marine precipitation, Journal of Geophysical Research:  
294 Atmospheres, 91, 6647–6658, <https://doi.org/10.1029/JD091iD06p06647>, 1986.

295 Keene, W. C., Pszenny, A. A. P., Jacob, D. J., Duce, R. A., Galloway, J. N., Schultz-Tokos, J. J.,  
296 Sievering, H., and Boatman, J. F.: The geochemical cycling of reactive chlorine through the  
297 marine troposphere, Global Biogeochemical Cycles, 4, 407–430,  
298 <https://doi.org/10.1029/GB004i004p00407>, 1990.

- 299 Keene, W. C., Pszenny, A. A. P., Maben, J. R., Stevenson, E., and Wall, A.: Closure evaluation  
300 of size-resolved aerosol pH in the New England coastal atmosphere during summer, *Journal of*  
301 *Geophysical Research: Atmospheres*, 109, D23307, <https://doi.org/10.1029/2004JD004801>,  
302 2004.
- 303 Keene, W. C., Stutz, J., Pszenny, A. A. P., Maben, J. R., Fischer, E. V., Smith, A. M., von  
304 Glasow, R., Pechtl, S., Sive, B. C., and Varner, R. K.: Inorganic chlorine and bromine in coastal  
305 New England air during summer, *Journal of Geophysical Research: Atmospheres*, 112, D10S12,  
306 <https://doi.org/10.1029/2006JD007689>, 2007.
- 307 Klopper, D., Formenti, P., Namwoonde, A., Cazaunau, M., Chevaillier, S., Feron, A., Gaimoz,  
308 C., Hease, P., Lahmidi, F., Mirande-Bret, C., Triquet, S., Zeng, Z., and Piketh, S. J.: Chemical  
309 composition and source apportionment of atmospheric aerosols on the Namibian coast,  
310 *Atmospheric Chemistry and Physics*, 20, 15811–15833, [https://doi.org/10.5194/acp-20-15811-](https://doi.org/10.5194/acp-20-15811-2020)  
311 2020, 2020.
- 312 Lamberg, H., Nuutinen, K., Tissari, J., Ruusunen, J., Yli-Pirilä, P., Sippula, O., Tapanainen, M.,  
313 Jalava, P., Makkonen, U., Teinilä, K., Saarnio, K., Hillamo, R., Hirvonen, M.-R., and Jokiniemi,  
314 J.: Physicochemical characterization of fine particles from small-scale wood combustion,  
315 *Atmospheric Environment*, 45, 7635–7643, <https://doi.org/10.1016/j.atmosenv.2011.02.072>,  
316 2011.
- 317 Manders, A. M. M., Schaap, M., Querol, X., Albert, M. F. M. A., Vercauteren, J., Kuhlbusch, T.  
318 A. J., and Hoogerbrugge, R.: Sea salt concentrations across the European continent, *Atmospheric*  
319 *Environment*, 44, 2434–2442, <https://doi.org/10.1016/j.atmosenv.2010.03.028>, 2010.
- 320 Murphy, D. M., Froyd, K. D., Bian, H., Brock, C. A., Dibb, J. E., DiGangi, J. P., Diskin, G.,  
321 Dollner, M., Kupc, A., Scheuer, E. M., Schill, G. P., Weinzierl, B., Williamson, C. J., and Yu, P.:  
322 The distribution of sea-salt aerosol in the global troposphere, *Atmospheric Chemistry and*  
323 *Physics*, 19, 4093–4104, <https://doi.org/10.5194/acp-19-4093-2019>, 2019.
- 324 Nolte, C., Bhave, P., Arnold, J., Dennis, R., Zhang, K., and Wexler, A.: Modeling urban and  
325 regional aerosols—Application of the CMAQ-UCD Aerosol Model to Tampa, a coastal urban  
326 site, *Atmospheric Environment*, 42, 3179–3191, <https://doi.org/10.1016/j.atmosenv.2007.12.059>,  
327 2008.
- 328 Ondov, J. M., Choquette, C. E., Zoller, W. H., Gordon, G. E., Biermann, A. H., and Heft, R. E.:  
329 Atmospheric behavior of trace elements on particles emitted from a coal-fired power plant,  
330 *Atmospheric Environment*, 23, 2193–2204, [https://doi.org/10.1016/0004-6981\(89\)90181-9](https://doi.org/10.1016/0004-6981(89)90181-9),  
331 1989.
- 332 Ooki, A., Uematsu, M., Miura, K., and Nakae, S.: Sources of sodium in atmospheric fine  
333 particles, *Atmospheric Environment*, 36, 4367–4374, [https://doi.org/10.1016/S1352-](https://doi.org/10.1016/S1352-2310(02)00341-2)  
334 2310(02)00341-2, 2002.
- 335 Pilson, M. E. Q.: *An Introduction to the Chemistry of the Sea*, 1st ed., Prentice Hall, 1998.

- 336 Prospero, J. M.: Mineral and sea salt aerosol concentrations in various ocean regions, *Journal of*  
337 *Geophysical Research: Oceans*, 84, 725–731, <https://doi.org/10.1029/JC084iC02p00725>, 1979.
- 338 Quinn, P. K. and Bates, T. S.: Regional aerosol properties: Comparisons of boundary layer  
339 measurements from ACE 1, ACE 2, Aerosols99, INDOEX, ACE Asia, TARFOX, and NEAQS,  
340 *Journal of Geophysical Research: Atmospheres*, 110, D14202,  
341 <https://doi.org/10.1029/2004JD004755>, 2005.
- 342 Quinn, P. K., Coffman, D. J., Bates, T. S., Miller, T. L., Johnson, J. E., Voss, K., Welton, E. J.,  
343 and Neusüss, C.: Dominant aerosol chemical components and their contribution to extinction  
344 during the Aerosols99 cruise across the Atlantic, *Journal of Geophysical Research: Atmospheres*,  
345 106, 20783–20809, <https://doi.org/10.1029/2000JD900577>, 2001.
- 346 Riley, J. P. and Chester, R. (Eds.): Copyright, in: *Chemical Oceanography (Second Edition)*,  
347 Academic Press, iv, <https://doi.org/10.1016/B978-0-12-588606-2.50002-3>, 1976.
- 348 Scheff, P. A. and Valiozis, C.: Characterization and source identification of respirable particulate  
349 matter in Athens, Greece, *Atmospheric Environment. Part A. General Topics*, 24, 203–211,  
350 [https://doi.org/10.1016/0960-1686\(90\)90457-X](https://doi.org/10.1016/0960-1686(90)90457-X), 1990.
- 351 Seinfeld, J. H. and Pandis, S. N.: *Atmospheric Chemistry and Physics: From Air Pollution to*  
352 *Climate Change*, John Wiley & Sons, 1146 pp., 2016.
- 353 Shinozuka, Y., Clarke, A. D., Howell, S. G., Kapustin, V. N., and Huebert, B. J.: Sea-salt vertical  
354 profiles over the Southern and tropical Pacific oceans: Microphysics, optical properties, spatial  
355 variability, and variations with wind speed, *Journal of Geophysical Research: Atmospheres*, 109,  
356 D24201, <https://doi.org/10.1029/2004JD004975>, 2004.
- 357 Spada, M., Jorba, O., Pérez García-Pando, C., Janjic, Z., and Baldasano, J. M.: On the evaluation  
358 of global sea-salt aerosol models at coastal/orographic sites, *Atmospheric Environment*, 101, 41–  
359 48, <https://doi.org/10.1016/j.atmosenv.2014.11.019>, 2015.
- 360 Stumm, W. and Morgan, J. J. aut: *Aquatic chemistry : an introd. emphasizing chemical equilibria*  
361 *in natural waters*, New York [u.a.] : Wiley, 804 pp., 1981.
- 362 Turn, S. Q., Jenkins, B. M., Chow, J. C., Pritchett, L. C., Campbell, D., Cahill, T., and Whalen,  
363 S. A.: Elemental characterization of particulate matter emitted from biomass burning: Wind  
364 tunnel derived source profiles for herbaceous and wood fuels, *Journal of Geophysical Research:*  
365 *Atmospheres*, 102, 3683–3699, <https://doi.org/10.1029/96JD02979>, 1997.
- 366 Wai, K.-M. and Tanner, P. A.: Wind-dependent sea salt aerosol in a Western Pacific coastal area,  
367 *Atmospheric Environment*, 38, 1167–1171, <https://doi.org/10.1016/j.atmosenv.2003.11.007>,  
368 2004.
- 369 Watson, J. G., Chow, J. C., and Houck, J. E.: PM<sub>2.5</sub> chemical source profiles for vehicle  
370 exhaust, vegetative burning, geological material, and coal burning in Northwestern Colorado  
371 during 1995, *Chemosphere*, 43, 1141–1151, [https://doi.org/10.1016/S0045-6535\(00\)00171-5](https://doi.org/10.1016/S0045-6535(00)00171-5),  
372 2001.

- 373 Wilson, T. R. S.: Salinity and the major elements of sea water, in: Chemical Oceanography, vol.  
374 1, Academic, Orlando, FL, USA, 365–413, 1975.
- 375 Yao, X. and Zhang, L.: Chemical processes in sea-salt chloride depletion observed at a Canadian  
376 rural coastal site, *Atmospheric Environment*, 46, 189–194,  
377 <https://doi.org/10.1016/j.atmosenv.2011.09.081>, 2012.
- 378 Zhao, Y. and Gao, Y.: Acidic species and chloride depletion in coarse aerosol particles in the US  
379 east coast, *Science of The Total Environment*, 407, 541–547,  
380 <https://doi.org/10.1016/j.scitotenv.2008.09.002>, 2008.
- 381 Zhuang, H., Chan, C. K., Fang, M., and Wexler, A. S.: Formation of nitrate and non-sea-salt  
382 sulfate on coarse particles, *Atmospheric Environment*, 33, 4223–4233,  
383 [https://doi.org/10.1016/S1352-2310\(99\)00186-7](https://doi.org/10.1016/S1352-2310(99)00186-7), 1999.

384
